1 **Infusion of CCR5 Gene-Edited T Cells Allows Immune Reconstitution, HIV**  
2 **Reservoir Decay, and Long-Term Virological Control**

3 Joumana Zeidan<sup>1\*φ</sup>, Ashish A. Sharma<sup>1,2\*</sup>, Gary Lee<sup>3</sup>, Angie Raad<sup>4</sup>, Remi Fromentin<sup>5,6</sup>,  
4 Slim Fourati<sup>1,2</sup>, Khader Ghneim<sup>1,2</sup>, Gabriela P. Sanchez<sup>1,2</sup>, Clarisse Benne<sup>1</sup>, Glenda  
5 Canderan<sup>1</sup>, Francesco A. Procopio<sup>7</sup>, Robert Balderas<sup>8</sup>, Georges Monette<sup>4</sup>, Jacob P.  
6 Lalezari<sup>9</sup>, Jane M. Heffernan<sup>4</sup>, Laurent Sabbagh<sup>5</sup>, Nicolas Chomont<sup>5,6</sup>, Dale Ando<sup>3¶</sup>,  
7 Steven G. Deeks<sup>10</sup>, and Rafick-Pierre Sekaly<sup>1,2φ</sup>

8 <sup>1</sup>Case Western Reserve University, Cleveland, Ohio, USA

9 <sup>2</sup>Emory University, Atlanta, Georgia, USA

10 <sup>3</sup>Sangamo Therapeutics, Richmond, California, USA

11 <sup>4</sup>Centre for Disease Modelling, Mathematics & Statistics, York University, Toronto,  
12 Ontario, Canada

13 <sup>5</sup>Université de Montréal, Faculty of Medicine, Department of Microbiology, Infectiology,  
14 and Immunology, Montreal, Quebec, Canada

15 <sup>6</sup>Université de Montréal, Centre de Recherche du CHUM, Montreal, Quebec, Canada

16 <sup>7</sup>Lausanne University Hospital (CHUV), Lausanne, Switzerland

17 <sup>8</sup>BD Biosciences, San Jose, California, USA

18 <sup>9</sup>Quest Clinical Research, San Francisco, California, USA

19 <sup>10</sup>University of California, San Francisco and San Francisco General Hospital, San  
20 Francisco, California, USA

21

22 *\*Both authors contributed equally to this work.*

23 *φRafick-Pierre Sekaly and Joumana Zeidan are the corresponding authors for this*  
24 *manuscript. Please direct all inquiries to: [rafick.sekaly@emory.edu](mailto:rafick.sekaly@emory.edu)*

25 *¶Deceased.*

26

27

28

29

30

31

32

33

34

35 **Abstract**

36 Antiretroviral therapy (ART) fails to fully restore immune function and is not curative. A  
37 single infusion of CCR5 gene-edited autologous CD4<sup>+</sup> T cells (SB-728-T) led to  
38 sustained increases in CD4<sup>+</sup> T cell counts, improved T cell homeostasis, and reduced the  
39 estimated size of the HIV reservoir. These outcomes were associated with the expansion  
40 and long-term persistence of a novel CCR5 gene-edited CD4<sup>+</sup> T memory stem cell  
41 (CD45RA<sup>int</sup>RO<sup>int</sup> T<sub>SCM</sub>) subset that can replenish the pool of more differentiated memory  
42 cells. We showed that novel CD45RA<sup>int</sup>RO<sup>int</sup> T<sub>SCM</sub> cells are transcriptionally distinct  
43 from the previously described CD45RA<sup>+</sup> T<sub>SCM</sub> and are minimally differentiated cells  
44 uncommitted to a specific Th-lineage. Subsequently, we showed in an independent trial  
45 that infusion of the SB-728-T cell product resulted in partial control of viral replication  
46 upon cessation of ART which was correlated with the frequencies of CCR5 gene-edited  
47 T<sub>SCM</sub> and their T<sub>EM</sub> progeny. Interestingly, one participant that remained off ART to this  
48 date demonstrated long-term maintenance of CCR5 gene-edited cells and increased  
49 frequency of polyfunctional HIV-specific CD4<sup>+</sup> and CD8<sup>+</sup> T cells, contributing to low  
50 levels of viral load 5 years post-infusion. Consequently, the generation of HIV protected  
51 memory CD4<sup>+</sup> T cells by CCR5 disruption can contribute toward novel interventions  
52 aimed at achieving a sustained ART-free viral remission of HIV disease.

53

## 54 **Introduction**

55 Although ART can durably suppress viral replication, HIV persists indefinitely, requiring  
56 infected individuals to remain on complex antiretroviral drug regimens for life. The  
57 ability of ART to reconstitute immune function is highly variable. A subset of individuals  
58 who initiate ART later in the disease course (10% to 45%, i.e., “immune non-  
59 responders”) fail to exhibit complete restoration of CD4<sup>+</sup> T cell counts even after years of  
60 effective ART<sup>1</sup>. Diminished CD4<sup>+</sup> T cell recovery has been associated with several host-  
61 related and HIV-related factors such as impaired thymopoiesis and homeostasis<sup>2-4</sup>. As  
62 low CD4<sup>+</sup> T cell counts in individuals on ART have been associated with increased risk  
63 of cardiovascular complications, cancer and other comorbidities<sup>5-8</sup>, novel therapeutic  
64 approaches to restore immune homeostasis are needed.

65 Studies quantifying the latent HIV reservoir have shown minimal decay of total and  
66 integrated HIV DNA four years post ART initiation, particularly in participants who  
67 received ART only during the chronic phase of infection<sup>9,10</sup>. Several mechanisms  
68 contribute to HIV persistence including “latent” infection of long-lived memory CD4<sup>+</sup> T  
69 cells<sup>11-13</sup> that are maintained by homeostatic proliferation<sup>14-16</sup> and dysfunctional host  
70 clearance mechanisms<sup>2,17</sup>. Intriguingly, these mechanisms are exacerbated in immune  
71 non-responders<sup>3,18,19</sup> and have been associated with higher frequencies of HIV-infected  
72 cells<sup>20</sup>. Therefore, enhancing the recovery of CD4<sup>+</sup> T cells may contribute to the  
73 reduction of the HIV reservoir during ART.

74 CCR5 is one of the major co-receptors for HIV entry. The therapeutic advantage of  
75 providing HIV-infected individuals with a CCR5-deficient immune compartment was

76 demonstrated with the “Berlin Patient”<sup>21,22</sup>, who was HIV-free since receiving allogeneic  
77 bone marrow transplants of CD34<sup>+</sup> stem cells from a homozygous CCR5 $\Delta$ 32 matched  
78 donor. While these results are encouraging, a less invasive and a more broadly applicable  
79 curative strategy would be desirable. One approach is to reconstitute immune function  
80 through adoptive transfer of autologous T cells which has shown promising results in  
81 other viral infections, including cytomegalovirus and Epstein-Barr virus<sup>23,24</sup>, but largely  
82 failed in HIV infection<sup>25-28</sup>, partly because CD4<sup>+</sup> T cells remain susceptible to HIV  
83 infection. Perez *et al.*, demonstrated that HIV-infected NOD/SCID/IL-2R $\gamma$ <sup>null</sup> mice  
84 transplanted with CCR5 gene-edited cells had higher CD4<sup>+</sup> T cells and lower plasma  
85 viremia compared to mice that received mock CD4<sup>+</sup> T cells<sup>29</sup>. In addition, a clinical trial  
86 with adoptively transferred zinc finger nuclease (ZFN)-mediated CCR5 gene-edited  
87 CD4<sup>+</sup> T cells (SB-728-T products) in HIV-infected adults demonstrated that infusion was  
88 safe, well tolerated and led to increased CD4<sup>+</sup> T cell counts<sup>30</sup>. Herein, we show in two  
89 independent clinical trials that expansion of CD45RA<sup>int</sup>RO<sup>int</sup> T<sub>SCM</sub> and resetting of T cell  
90 homeostasis is a mechanism that underlies the long-term benefits of this intervention.

## 91 **Results**

92 *A novel memory stem cell-like CD4<sup>+</sup> T cell subset contributes to restoration of T cell*  
93 *homeostasis and correlates with reservoir decay.*

94 The clinical study SB-728-0902 evaluated nine HIV-infected immune non-responders on  
95 long-term ART (7-22 years) who had at baseline a mean CD4<sup>+</sup> T cell count of 363  
96 cells/ $\mu$ L (**Supplementary Table 1**).

97 All participants received a single infusion of  $1 \times 10^{10}$  to  $3 \times 10^{10}$  SB-728-T product  
98 containing between 14% to 36% ZFN-mediated CCR5 gene-edited alleles (3 cohorts,  $n =$   
99 9; see online Methods and **Supplementary Table 2**). The infused product was devoid of  
100 naïve cells and included mostly ( $34\% \pm 16$ ) effector memory cells ( $T_{EM}$ ) and a population  
101 that expressed intermediate levels of both CD45RA and CD45RO ( $CD45RA^{int}RO^{int}$ ;  
102 mean of  $31\% \pm 17$ ). A subset of  $CD45RA^{int}RO^{int}$  cells ( $14.5\% \pm 7.05$ ) also expressed  
103 CD27 and CCR7 (**Supplementary Fig. 1a, b**).  $CD45RA^{int}RO^{int}CD27^{+}CCR7^{+}$  cells had  
104 the highest levels of gene edited alleles in SB-728-T ( $45.9\%$  vs.  $37.9\%$  in  $T_{EM}$ ,  $P = 0.002$ ;  
105 **Supplementary Fig. 1c**), as determined by deep sequencing of the CCR5 allele. The  
106 frequency of cells harboring integrated HIV DNA in the product was significantly lower  
107 than that of pre-manufacture cells ( $P = 0.0039$ ; **Supplementary Fig. 1d**). The frequency  
108 of integrated HIV DNA was significantly lower in  $CD45RA^{int}RO^{int}CD27^{+}CCR7^{+}$  cells  
109 from SB-728-T products than in other memory subsets (mean of  $58.11$  copy/ $10^6$  cells vs.  
110  $679.4$  copy/ $10^6$  cells in  $T_{EM}$ ,  $P = 0.0078$ ; **Supplementary Fig. 1e**).

111 CCR5 gene-edited cells expanded post infusion and peaked at 7-21 days (median 2.4-fold  
112 expansion at 21 days; **Supplementary Fig. 2a**). CCR5 gene-edited  $CD4^{+}$  T cells,  
113 assessed by the Pentamer Duplication assay (a measure of a specific five-nucleotide  
114 insertion at the site of ZFN-mediated editing that represents  $\sim 25\%$  of all modified  
115 sequences<sup>29,30</sup>) and DNA-Seq of the CCR5 locus, were detected up to 3-4 years in  
116 PBMCs (**Supplementary Table 2**), with frequencies of gene-edited alleles in  $CD4^{+}$  T  
117 cells ranging between 5 and 15.7% ( $n = 5$ ; **Supplementary Fig. 2b**), and up to 12  
118 months (last sampled time point) in rectal mucosal biopsies (**Supplementary Fig. 2c**). In  
119 addition, the frequency of edited mononuclear cells in lymph node tissues ( $n = 3$ ) was

120 similar to that found in the periphery (**Supplementary Fig. 2d**). Consequently, peripheral  
121 CD4<sup>+</sup> T cells counts also increased post-infusion (**Supplementary Table 2 and**  
122 **Supplementary Fig. 2e**), similar to the findings of Tebas *et al.*<sup>30</sup>, and remained  
123 significantly above baseline (BL) for 3-4 years post-infusion (+162 cells/ $\mu$ L,  $P = 0.02$ ;  
124 **Supplementary Fig. 2e**). The infusion dose (CCR5 gene-edited cell numbers) did not  
125 correlate with peak or long-term CD4<sup>+</sup> T cell counts ( $P = 0.95$  and  $P = 0.91$ ; data not  
126 shown). Increased CD4<sup>+</sup> T cell counts and the restoration of the CD4:CD8 ratio (mean of  
127 0.62 at BL vs. at 0.84 month 12,  $P = 0.0078$ ; data not shown) were associated with the  
128 expansion of gene-edited cells post-infusion (**Supplementary Table 3**).

129 To identify the mechanisms leading to the reconstitution of CD4<sup>+</sup> T cells, a longitudinal  
130 analysis of the distribution of CD4<sup>+</sup> T cell subsets post-infusion was performed. We  
131 found a specific increase in the frequency and absolute numbers of CD4<sup>+</sup> T cells  
132 expressing intermediate levels of CD45RA and CD45RO (termed “CD45RA<sup>int</sup>RO<sup>int</sup>”) at  
133 every time point analyzed post-infusion (from 13.8% at BL to 38.9% at day 14-28 ( $P =$   
134 0.03) and 25.4% at year 3-4 ( $P = 0.008$ ); **Fig. 1a and Supplementary Fig. 3a and b**).  
135 CD45RA<sup>int</sup>RO<sup>int</sup> cells expressed markers previously shown to be up-regulated on  
136 CD45RA<sup>+</sup> memory stem cells (CD45RA<sup>+</sup> T<sub>SCM</sub>)<sup>31</sup>, such as CD127, CD28, CD58 and  
137 CD95<sup>32</sup> (**Fig. 1b**), suggesting that this subset could represent a novel T<sub>SCM</sub> subset.  
138 Increased CD45RA<sup>int</sup>RO<sup>int</sup> T<sub>SCM</sub> counts (**Supplementary Fig. 3c**), but not that of any  
139 other memory subsets, were significantly correlated with long-term increases of CD4<sup>+</sup> T  
140 cell counts (**Table 1**) as well as with long-term frequencies of CCR5 gene-edited CD4<sup>+</sup> T  
141 cells ( $P = 0.0002$ , **Supplementary Fig. 3d**). Consequently, levels of the Pentamer  
142 Duplication marker were specifically enriched within CD45RA<sup>int</sup>RO<sup>int</sup> T<sub>SCM</sub> post-infusion

143 with a mean of 10- and 38-fold higher levels in CD45RA<sup>int</sup>RO<sup>int</sup> T<sub>SCM</sub> compared to  
144 central memory (T<sub>CM</sub>) or effector memory (T<sub>EM</sub>) cells at years 3-4, respectively (**Fig. 1c**).  
145 Sequencing of CCR5 DNA mutations confirmed the long-term enrichment of CCR5  
146 gene-edited alleles in CD45RA<sup>int</sup>RO<sup>int</sup> T<sub>SCM</sub> (23% ± 11 CCR5 gene-edited alleles at year  
147 3-4 compared to 7.9% ± 5.1 in T<sub>CM</sub> ( $P = 0.02$ ) and 5.9% ± 6.6 in T<sub>TM</sub> ( $P = 0.02$ );  
148 **Supplementary Fig. 3e**). Importantly, expansion of CD45RA<sup>int</sup>RO<sup>int</sup> T<sub>SCM</sub> post infusion  
149 was associated with a polyclonal reconstitution of the CD4<sup>+</sup> T cell compartment as no  
150 changes were observed in CCR5 insertion/deletion (indel) diversity (**Supplementary Fig.**  
151 **3f**) and in TCR diversity, as measured by similar Shannon entropy indexes<sup>33</sup>  
152 (**Supplementary Fig. 3g**), post infusion.

153 The presence of CCR5 gene mutations in short-lived memory cells such as T<sub>EM</sub> at years  
154 3-4 post-infusion (0.7% to 3% CCR5 gene-edited alleles; **Supplementary Fig. 3e**)  
155 suggested that CCR5 gene-edited cells within long-lived memory cells such as T<sub>SCM</sub> can  
156 differentiate and maintain a small subset of CCR5 gene-edited T<sub>EM</sub> cells years after the  
157 initial infusion. We identified CCR5 ZFN-mediated indels unique to the CD45RA<sup>int</sup>RO<sup>int</sup>  
158 T<sub>SCM</sub> subset in SB-728-T products ( $n = 3,881$ ) that remained detected in CD45RA<sup>int</sup>RO<sup>int</sup>  
159 T<sub>SCM</sub> at 3-4 years post infusion, demonstrating their capacity to persist long-term.  
160 Additionally, CD45RA<sup>int</sup>RO<sup>int</sup> T<sub>SCM</sub>-unique indels were detected in other memory T cell  
161 subsets post-infusion including short-lived T<sub>EM</sub> at 3-4 years post infusion (0.49% (95%  
162 CI: 0%-1.36%); **Fig. 1d**), suggesting the potential of these cells to generate more  
163 differentiated cells. The detection of CD45RA<sup>int</sup>RO<sup>int</sup> T<sub>SCM</sub>-unique indels in the  
164 CD45RA<sup>+</sup> T<sub>SCM</sub> subset (**Fig. 1d**) as well as the detection of high levels of the Pentamer  
165 Duplication marker in these cells (**Fig. 1d**) suggest that the increase in CD45RA<sup>+</sup> T<sub>SCM</sub>

166 **(Supplementary Fig. 3c)** post infusion is a result of their differentiation from  
167 CD45RA<sup>int</sup>RO<sup>int</sup> T<sub>SCM</sub> post infusion and not from homeostatic proliferation.

168 To investigate the potential of CD45RA<sup>int</sup>RO<sup>int</sup> T<sub>SCM</sub> cells to undergo homeostatic  
169 expansion or self-renewal and differentiate into other memory subsets following *in vitro*  
170 stimulation, CD45RA<sup>int</sup>RO<sup>int</sup> T<sub>SCM</sub> cells were sorted at year 3-4, labelled with CellTrace  
171 Violet (CTV), and cocultured with anti-CD3/CD28 Dynabeads and homeostatic  
172 cytokines (**Fig. 1e**). At days 4 and 6, the majority of cells had undergone proliferation  
173 (91% and 97% CTV low cells, respectively; **Supplementary Fig. 4a**). Cells of the  
174 CD45RA<sup>int</sup>RO<sup>int</sup> phenotype remained detected throughout culture while CD45RO<sup>+</sup>  
175 memory T cells increased progressively (**Fig. 1f**). Interestingly, CD45RA<sup>+</sup> T<sub>SCM</sub> peaked  
176 at day 2 and were detected in cells undergoing 0-1 rounds of proliferation (**Fig. 1f and**  
177 **Supplementary Fig. 4b**), suggesting that this subset has limited self-renewal capacity  
178 and/or is more prone to undergo differentiation with increased cell proliferation. Uniform  
179 Manifold Approximation and Projection (UMAP), a non-linear dimensionality reduction  
180 technique<sup>34</sup>, was employed to investigate the modulation of markers associated with self-  
181 renewal and Th-lineage commitment throughout cell division in culture. Two  
182 PhenoGraph clusters were identified (**Fig. 1g and Supplementary Fig. 4c**); cluster 13,  
183 which was the most abundant cluster in cells with one cycle of proliferation, decreased in  
184 frequencies during proliferation and maintained the CD45RA<sup>int</sup>RO<sup>int</sup> T<sub>SCM</sub> phenotype and  
185 expression of CD27, CCR7, 41BB, and TCF-7, and cluster 6 which increased during  
186 proliferation, consisted of the main cluster in cells with 4+ cycles of proliferation, and up-  
187 regulated expression of CD45RO, T-bet and GATA-3 (**Fig. 1h and Supplementary Fig.**  
188 **4d**). All together, these results indicate that CD45RA<sup>int</sup>RO<sup>int</sup> T<sub>SCM</sub> cells most likely



189 represent a novel long-lived memory subset that contributes to the long-term polyclonal  
190 persistence of CCR5 gene-edited cells and confirm that  $CD45RA^{int}RO^{int} T_{SCM}$  cells can  
191 differentiate into and replenish the pool of more differentiated memory cells.

192

193 *A single SB-728-T infusion led to a continuous decrease in the frequency of HIV-*  
194 *infected cells that correlates with the persistence and differentiation of CCR5 gene-*  
195 *edited  $CD45RA^{int}RO^{int} T_{SCM}$  cells.*

196 Infusion of SB-728-T led to significantly lower frequencies of total HIV DNA in PBMCs  
197 at 2 years ( $P = 0.02$ ; **Fig. 2a and Supplementary Table 4**) compared to baseline.  
198 Moreover, the frequencies of  $CD4^{+}$  T cells with integrated HIV DNA significantly  
199 declined at 3-4 years post-infusion ( $P = 0.004$ ; **Fig. 2b**) and correlated with the  
200 frequencies of total HIV proviruses, as measured by the intact proviral DNA assay  
201 (IPDA) ( $P = 0.02$ ; **Fig. 2c**). These results suggest that expansion and persistence of  
202 infused CCR5 gene-edited  $CD4^{+}$  T cells have an impact on the decay of the HIV  
203 reservoir size.

204 As  $CD45RA^{int}RO^{int} T_{SCM}$  cells had significantly lower levels of integrated HIV DNA  
205 post-infusion compared to other memory subsets ( $P < 0.05$ ; **Supplementary Fig. 5a**)  
206 and minimal contribution to the pool of HIV-infected  $CD4^{+}$  T cells ( $P < 0.05$ ;  
207 **Supplementary Fig. 5b**) in year 3-4 samples, we investigated the impact of persistence  
208 and differentiation of  $CD45RA^{int}RO^{int} T_{SCM}$  post-infusion on the reservoir decay, using a  
209 sparse linear multivariate model to identify features (**Supplementary Table 5**) that could  
210 predict the change in the frequency of PBMCs harboring total HIV DNA post-infusion.

211 This model indicated that a greater decay in the HIV reservoir post-infusion was best  
212 predicted by higher CD45RA<sup>int</sup>RO<sup>int</sup> T<sub>SCM</sub> cell counts at years 3-4 ( $P = 0.002$ ), higher  
213 frequencies of Pentamer Duplication in CD45RA<sup>int</sup>RO<sup>int</sup> T<sub>SCM</sub> at years 3-4 ( $P = 0.005$ ),  
214 and a lower ratio of the frequency of Pentamer Duplication in CD45RA<sup>int</sup>RO<sup>int</sup> T<sub>SCM</sub> over  
215 the frequency of Pentamer Duplication in T<sub>EM</sub> at years 3-4 ( $P = 0.001$ ), reflecting the  
216 differentiation of CCR5 gene-edited CD45RA<sup>int</sup>RO<sup>int</sup> T<sub>SCM</sub> into the T<sub>EM</sub> subset (adjusted  
217  $r^2 = 0.99$ , F-test:  $P = 0.0008$ ; **Fig. 2d**).

218 Linear regression analysis of genesets of sorted CD45RA<sup>int</sup>RO<sup>int</sup> T<sub>SCM</sub> cells post infusion  
219 with the decay of HIV reservoir (total HIV DNA ratio) showed that pathways associated  
220 with homeostatic proliferation (STAT-5 signaling) and stemness (Wnt signaling) were  
221 correlated with a greater decay in HIV DNA 2 years post infusion (**Fig. 2e**),  
222 demonstrating that the pathways crucial for T<sub>SCM</sub> homeostasis are also involved in the  
223 observed decay of HIV-infected cells<sup>35,36</sup> (**Supplementary Fig. 5c and Supplementary**  
224 **Table 6**). As CD45RA<sup>int</sup>RO<sup>int</sup> T<sub>SCM</sub> cells harbor significantly lower levels of HIV-  
225 infected cells than other memory subsets (**Supplementary Figs. 1e, 5a, 5b**), our results  
226 suggest that long-term persistence of CCR5 gene-edited CD45RA<sup>int</sup>RO<sup>int</sup> T<sub>SCM</sub> can lead  
227 to a reduction in the size of the HIV reservoir as a result of these cells differentiating into  
228 and replenishing the pool of more differentiated T<sub>EM</sub>.

229 *CD45RA<sup>int</sup>RO<sup>int</sup> T<sub>SCM</sub> are distinct from the previously described CD45RA<sup>+</sup> T<sub>SCM</sub> and*  
230 *are minimally differentiated cells uncommitted to a specific Th-lineage.*

231 Transcriptional analysis of sorted CD4<sup>+</sup> T cell subsets was performed on samples from 3-  
232 4 years post-infusion. Multi-dimensional scaling of gene expression variance and

233 differential gene expression analysis showed greater dissimilarity between  
234 CD45RA<sup>int</sup>RO<sup>int</sup> T<sub>SCM</sub> and T<sub>CM</sub> and T<sub>EM</sub> than with CD45RA<sup>+</sup> T<sub>SCM</sub> (**Supplementary Fig.**  
235 **6a,b**). Our results also indicated that CD45RA<sup>int</sup>RO<sup>int</sup> T<sub>SCM</sub> were transcriptionally distinct  
236 from the CD45RA<sup>+</sup> T<sub>SCM</sub> subset previously described<sup>31,32</sup>. Figure 3a shows that  
237 CD45RA<sup>+</sup> T<sub>SCM</sub> expressed several genes associated with T cell activation (e.g., TOX,  
238 LAG-3) and effector function (e.g., Perforin, IFN- $\gamma$ , Granzyme B). CD45RA<sup>int</sup>RO<sup>int</sup>  
239 T<sub>SCM</sub> showed upregulated levels of ID3, CCR7, and CD27, all markers of  
240 undifferentiated mature memory CD4<sup>+</sup> T cells<sup>37,38</sup> (**Fig. 3a**). SLEA analysis (**Fig. 3b** and  
241 **Supplementary Table 7**) further demonstrates that CD45RA<sup>int</sup>RO<sup>int</sup> T<sub>SCM</sub> show  
242 downregulation of genes associated with activation and cell cycling pathways. Definite  
243 demonstration that these two subsets are distinct is also shown in Fig. 3b, where the  
244 pathways associated with T cell stemness<sup>31</sup> were found to be enriched in CD45RA<sup>int</sup>RO<sup>int</sup>  
245 T<sub>SCM</sub> compared to CD45RA<sup>+</sup> T<sub>SCM</sub>.

246 Further indication that CD45RA<sup>int</sup>RO<sup>int</sup> T<sub>SCM</sub> cells are uncommitted to a specific Th  
247 lineage is demonstrated by the lack of expression of the transcription factors associated  
248 with Th1 (T-bet and Eomes), Th2 (GATA-3), and Th17 (ROR $\gamma$ t) subsets (**Fig. 3c**).  
249 Moreover, upon TCR stimulation of PBMCs at 3-4 years post-infusion, a cluster of cells  
250 comprised of CD45RA<sup>int</sup>RO<sup>int</sup> T<sub>SCM</sub> produced IL-2, MIP-1a, and TNF- $\alpha$  but not the  
251 effector cytokine IFN- $\gamma$  (**Fig. 3d-g**). In contrast, T<sub>EM</sub> produced the highest levels of the  
252 effector cytokines TNF- $\alpha$  and IFN- $\gamma$  upon stimulus (**Fig. 3f,g**). Altogether, these results  
253 confirmed that CD45RA<sup>int</sup>RO<sup>int</sup> T<sub>SCM</sub> cells constitute a novel T<sub>SCM</sub> subset with features of  
254 quiescent uncommitted and long-lived memory CD4<sup>+</sup> T cells; importantly, these features

255 are associated with the above observed decay of the HIV reservoir as well with immune  
256 reconstitution.

257 *CCR5 gene-edited CD45RA<sup>int</sup>RO<sup>int</sup> T<sub>SCM</sub> correlate with control of viral load in*  
258 *participants who underwent treatment interruption 6 weeks post-SB-728-T infusion.*

259 We assessed the impact of infusion of CCR5 gene-edited CD4<sup>+</sup> T cells, including  
260 CD45RA<sup>int</sup>RO<sup>int</sup> T<sub>SCM</sub>, on control of viremia upon cessation of ART in an independent  
261 clinical trial (SB-728-1101 study). Participants received escalating doses of  
262 cyclophosphamide (CTX) two days prior to infusion (5 cohorts,  $n = 15$ ; see online  
263 Methods and **Supplementary Table 8**) and underwent an analytical treatment  
264 interruption (ATI) six weeks post-infusion of SB-728-T products. Enrichment of CCR5  
265 mutations within the CD45RA<sup>int</sup>RO<sup>int</sup> T<sub>SCM</sub> ( $27.8\% \pm 10.4$  gene-edited alleles compared  
266 to  $13.3\% \pm 4.7$  in T<sub>CM</sub> ( $P = 0.02$ ) and  $18.8\% \pm 6.3$  in T<sub>TM</sub> ( $P = 0.02$ ); **Supplementary**  
267 **Fig. 7a**) was confirmed in SB-728-T products, likely a consequence of their capacity to  
268 self-renew and persist. Analysis of viral load (VL) levels showed significantly lower VL  
269 during ATI (at week 22) than the historic pre-ART VL set-point ( $P = 0.0054$ ; **Fig. 4a**),  
270 indicating that infusion of SB-728-T products may have led to transient but incomplete  
271 control of viremia in the majority of the participants. Six individuals who at week 22  
272 showed VL measurements below 10,000 copies/mL and CD4<sup>+</sup> T cell counts above 500  
273 cells/ $\mu$ l opted to extend ATI beyond week 22 (and remained on ATI for 0.5 – 5 years;  
274 **Supplementary Fig. 7b and Supplementary Table 9**). Amongst them, participants  
275 who showed a reduction of week 22 VL compared to the historic pre-ART VL greater  
276 than 0.5 log were labelled as post-treatment virologic controllers (PTCs). PTCs showed  
277 significantly lower levels of infected cells after 16 weeks of ATI than non-controllers, as

278 measured by integrated HIV DNA, as well as total and intact proviruses quantified with  
279 the IPDA assay (**Fig. 4b**). Frequencies of CD4<sup>+</sup> T cells with intact proviruses after 16  
280 weeks of ATI was significantly correlated with the week 22 VL ( $P = 0.0246$ ;  
281 **Supplementary Fig. 7c**), indicating that CD4<sup>+</sup> T cells harboring intact proviruses were  
282 contributing to the rebound in VL post ATI.

283 Furthermore, PTCs demonstrated significantly higher CD45RA<sup>int</sup>RO<sup>int</sup> T<sub>SCM</sub> cell counts  
284 prior to ATI (week 6) compared to non-controllers ( $P = 0.016$ ; **Fig. 4c**), indicating a role  
285 for these cells in control of VL. To provide an independent quantitative and qualitative  
286 assessment of the capacity of CCR5 gene-edited CD45RA<sup>int</sup>RO<sup>int</sup> T<sub>SCM</sub> to differentiate  
287 into effector memory subsets, we tracked the persistence of CCR5 mutations unique to  
288 CD45RA<sup>int</sup>RO<sup>int</sup> T<sub>SCM</sub> products in other memory cells post-infusion and post-ATI. We  
289 show that CD45RA<sup>int</sup>RO<sup>int</sup> T<sub>SCM</sub>-unique CCR5 mutations were detected in other CD4<sup>+</sup>  
290 memory subsets at week 6 (10.5%, 11% and 10.9% in T<sub>CM</sub>, in T<sub>TM</sub> and in T<sub>EM</sub>,  
291 respectively) and were maintained at similar frequencies at week 22 (11.7%, 11.3% and  
292 10.7% in T<sub>CM</sub>, in T<sub>TM</sub> and in T<sub>EM</sub>, respectively; **Fig. 4d**), demonstrating the multipotency  
293 capacity of this subset. As T<sub>EM</sub> cells have been shown to express the highest levels of  
294 CCR5 compared to other memory cells<sup>39</sup>, maintenance of a subset of CCR5 gene-edited  
295 cells within the T<sub>EM</sub> subset could lead to protection from *de novo* infection during ATI.  
296 To investigate this, we quantified the levels of CCR5 gene edited alleles in CD4<sup>+</sup> T cell  
297 subsets during ATI and found that PTCs showed significantly higher frequencies of  
298 CCR5 gene-edited alleles at week 22 exclusively in the T<sub>EM</sub> subset compared to non-  
299 controllers ( $P = 0.029$ ; **Fig. 4e**). Moreover, we measured integrated HIV DNA levels in  
300 sorted CD4<sup>+</sup> T cell subsets at baseline, and at weeks 6 and 22 post-infusion. Our results

301 indicate that the frequency of T<sub>EM</sub> bearing integrated HIV DNA was significantly  
302 increased in non-controllers during ATI ( $P = 0.0083$ ; **Fig. 4f**) but not in PTCs, with  
303 PTCs demonstrating significantly lower frequencies of infected T<sub>EM</sub> cells at week 22 than  
304 non-controllers ( $P = 0.0005$ ; **Fig. 4f**). Collectively, these results indicate that continuous  
305 replenishment of CCR5 gene-edited T<sub>EM</sub> cells downstream of differentiation from their  
306 CD45RA<sup>int</sup>RO<sup>int</sup> T<sub>SCM</sub> precursors confers greater protection from *de novo* infection of the  
307 T<sub>EM</sub> subset in PTCs, consequently having an impact on control of active viral replication  
308 during ATI.

309 *Long-term control of VL in a post-treatment controller that remained off ART for ~5*  
310 *years post-infusion is associated with enhanced HIV-specific CD4<sup>+</sup> and CD8<sup>+</sup> T cell*  
311 *responses.*

312 One of the SB-728-1101 trial participants (01-060) has remained off ART to this date  
313 since ART interruption at week 6 post-infusion (~5 years post infusion). This individual  
314 expressed the protective HLA-B57<sup>40-42</sup> allele and was heterozygote for the delta-32  
315 CCR5 mutation (**Supplementary Table 8**), which may have contributed to his observed  
316 VL control. This individual has since been enrolled in the SCOPE cohort (study  
317 NCT00187512, conducted at the University of California, San Francisco) and has  
318 demonstrated control of VL at low but detectable levels (~100 copies/mL; **Fig.5a**). CD4<sup>+</sup>  
319 T cell counts have decreased between the last time point (month 12) in the SB-728-1101  
320 trial and his enrollment in the SCOPE cohort to ~200 cells/ $\mu$ l (**Fig. 5b**); however, this  
321 individual declined ART resumption, providing us with a unique opportunity to  
322 investigate the role of CCR5 gene-edited cells in partial VL control. Using the Pentamer  
323 Duplication assay, we observed higher levels of CCR5 gene-edited cells at 4 years post-

324 infusion compared to month 12 (~12% of CD4<sup>+</sup> cells at year 4 compared to ~8% at year  
325 1; **Fig 5c**), demonstrating the long-term maintenance of these cells as well as their  
326 enrichment compared to the non-edited cells in the presence of prolonged active virus  
327 replication. The frequency of CD4<sup>+</sup> CD45RA<sup>int</sup>RO<sup>int</sup> T<sub>SCM</sub> cells remained high post  
328 infusion up to month 12 (48% at week 6 and 38% at month 12; **Supplementary Fig.**  
329 **8a,b**). However, the frequencies of CD4<sup>+</sup> CD45RA<sup>int</sup>RO<sup>int</sup> T<sub>SCM</sub> and T<sub>CM</sub> progressively  
330 decreased post-ATI (from 40% at year 1 to 6.5% at year 4 and from 10.5% at year 1 to  
331 3.6% at year 4, respectively) while that of CD4<sup>+</sup> T<sub>EM</sub> and CD8<sup>+</sup> T<sub>EM</sub> and T<sub>EMRA</sub>  
332 progressively increased (**Supplementary Fig. 8b**), indicating a pull for differentiation  
333 into the T<sub>EM</sub> and T<sub>EMRA</sub> subsets in the presence of viremia. To further characterize the  
334 heterogeneity of the CD45RA<sup>int</sup>RO<sup>int</sup> subset, a 22-color Symphony stemness panel was  
335 performed on longitudinal samples from patient 01-60 including years 4 and 5 samples.  
336 Phenograph analysis identified 2 clusters that increased at early time points post infusion  
337 that remained detected long term (clusters 2 and 6, as well as a cluster that was uniquely  
338 up-regulated at years 4 and 5 (cluster 13; **Fig. 5d, e and Supplementary Fig. 8c**).  
339 Compared to the year 4/5 cluster, the persistent clusters expressed high levels of CCR7,  
340 CD27, CD95, CD127, TCF-7, and 4-1BB (**Fig. 5f and Supplementary Fig. 8d,e**),  
341 indicating that a subset of cells of the CD45RA<sup>int</sup>RO<sup>int</sup> phenotype represent long-lasting  
342 memory stem cells that can maintain expression of stemness markers during ongoing  
343 viral replication. Cells expressing CD45RA<sup>int</sup>RO<sup>int</sup> but down-regulating CCR7 and CD27  
344 could represent cells transitioning to the T<sub>EM</sub> phenotype during ongoing viral replication.  
345 To determine the impact of persistence of CD45RA<sup>int</sup>RO<sup>int</sup> T<sub>SCM</sub> on CD4<sup>+</sup> T cell helper  
346 function, longitudinal samples were stimulated with HIV gag peptide pools (**Fig. 5g,h**).

347 Increased frequency of polyfunctional HIV-specific CD4<sup>+</sup> T cells (secreting high levels  
348 of TNF $\alpha$  and IFN $\gamma$ ) were detected at years 4 and 5 post infusion. Similarly, increased  
349 HIV-specific CD8<sup>+</sup> T cell responses were also detected at years 4 and 5 post infusion  
350 (**Fig. 5i,j**). Responding CD4<sup>+</sup> T cells included cells of T<sub>EM</sub> phenotype as well as  
351 CD45RA<sup>int</sup>RO<sup>int</sup> CD27<sup>-</sup>CCR7<sup>-</sup> cells, while responding CD8<sup>+</sup> T cells included cells of  
352 T<sub>TM</sub>, T<sub>EM</sub>, and T<sub>EMRA</sub> phenotypes (**Supplementary Fig. 9**). Concomitantly to increased  
353 HIV-specific T cell responses, a decrease in activation and exhaustion markers was  
354 observed in CD8<sup>+</sup> T cells at years 4 and 5 post infusion (**Supplementary Fig. 10**). To  
355 determine how ongoing viral replication impacted the frequency of intact HIV DNA  
356 proviruses, the IPDA assay was performed on longitudinal samples. The frequency of  
357 intact provirus in purified CD4<sup>+</sup> T cells remained low post ATI and increased between  
358 years 4 and 5 (from 6 to 127 copies per 10<sup>6</sup> cells; **Fig. 5k**). The low level of VL at year 5  
359 despite an increase in the frequency of intact provirus suggests a role for enhanced CD8<sup>+</sup>  
360 HIV-specific immunity in maintaining control of viral replication.

## 361 **Discussion**

362 Previous studies of non-modified autologous T cell infusion in HIV-infected humans did  
363 not result in sustained CD4<sup>+</sup> T cell reconstitution<sup>28,43,44</sup> nor HIV reservoir decay, partly  
364 due to minimal persistence of infused cells<sup>45</sup> and their susceptibility to infection<sup>46</sup>. Herein  
365 we show in two independent clinical trials that a single infusion of autologous CCR5  
366 gene-edited cells is safe and well tolerated (see online discussion). Importantly, we found  
367 in the first study (SB-728-0902) that this intervention led to a sustained albeit  
368 quantitatively modest increase in CD4<sup>+</sup> T cell numbers in individuals who failed to  
369 normalize their CD4<sup>+</sup> T cell counts despite long-term effective ART, as well as to a



370 significant long-term decay of the estimated size of the total HIV reservoir, with a  
371 decrease in HIV DNA of over 1 log<sub>10</sub> copies per million cells in 4 of the 9 individuals.  
372 The decrease in HIV-infected cells using measures of HIV DNA is in sharp contrast to  
373 the very stable levels reported during long-term ART<sup>9,10,47</sup> and in recent clinical trials  
374 using latency reversal agents<sup>48-52</sup> and was not a result of dilution of HIV-infected cells by  
375 the expansion of the infused product as the majority of the HIV decay was continuous  
376 over a span of 3 years. Our observed outcomes were associated with the expansion of a  
377 novel T<sub>SCM</sub> subset, CD45RA<sup>int</sup>RO<sup>int</sup> T<sub>SCM</sub>, that persisted long-term and comprised  
378 between 3 and 26% of CD4<sup>+</sup> T cells 3-4 years post-infusion. The association of the  
379 expansion of this novel CD45RA<sup>int</sup>RO<sup>int</sup> T<sub>SCM</sub> subset with improved control of HIV  
380 replication following ART interruption was demonstrated in the SB-728-1101 study. Our  
381 results highlighted the capacity of CD45RA<sup>int</sup>RO<sup>int</sup> T<sub>SCM</sub> to differentiate into downstream  
382 short-lived memory T cells, by tracking ZFN-mediated mutations specific to  
383 CD45RA<sup>int</sup>RO<sup>int</sup> T<sub>SCM</sub>, as well as the enhanced HIV-specific CD8<sup>+</sup> T cell responses  
384 through cognate or non-cognate help as mechanisms associated with reservoir decay and  
385 virological control.

386 A CD45RA<sup>+</sup>CD45RO<sup>-</sup>CCR7<sup>+</sup>CD27<sup>+</sup>CD95<sup>+</sup> T<sub>SCM</sub>-like phenotype was reported following  
387 *in vitro* expansion of purified CD4<sup>+</sup> and CD8<sup>+</sup> naive T cells<sup>35,53</sup> and *in vivo*<sup>31</sup>. This  
388 CD45RA<sup>+</sup> T<sub>SCM</sub> subset was shown to be endowed with self-renewal properties in serial  
389 transplantation experiments and long-term persistence (reviewed by Gattinoni et al<sup>54</sup>).  
390 The CD45RA<sup>int</sup>RO<sup>int</sup> T<sub>SCM</sub> subset described in both our clinical studies was present in the  
391 SB-728-T products and proliferated post-infusion as these cells significantly increased in  
392 cell frequencies. We demonstrated the importance of the longevity of CD45RA<sup>int</sup>RO<sup>int</sup>

393 T<sub>SCM</sub> in the long-term persistence of infused CCR5 gene-edited cells. The capacity of  
394 CD45RA<sup>int</sup>RO<sup>int</sup> T<sub>SCM</sub> for self-renewal was indicated by the presence of identical CCR5  
395 mutations in the products and 3-4 years post-infusion and the maintenance of a  
396 significant fraction (~25%) of gene-edited cells in this subset 3-4 years post-infusion. The  
397 importance of this stem cell phenotype for increased CD4<sup>+</sup> T cell numbers and HIV  
398 reservoir decay was confirmed as this subset was positively associated with both clinical  
399 outcomes, as well as with VL control.

400 Tracking of CCR5 ZFN-mediated mutations showed that CD45RA<sup>int</sup>RO<sup>int</sup> T<sub>SCM</sub> cells  
401 have the capacity to differentiate into other memory subsets including T<sub>EM</sub> (which  
402 included up to 3% of gene-edited alleles at years 3-4 post-infusion) defining this subset as  
403 a bona fide multipotent memory stem cell. Similar monitoring approaches of gene edited  
404 cells, using retroviral integration site (IS) analysis<sup>44,55-58</sup>, have shown the differentiation  
405 of HSC to naive T cells and demonstrated the transition of CD45RA<sup>+</sup> T<sub>SCM</sub> to T<sub>CM</sub> post-  
406 infusion of gene-edited cells. The potential of CD45RA<sup>int</sup>RO<sup>int</sup> T<sub>SCM</sub> to form a diverse  
407 progeny was confirmed *in vitro* following TCR stimulation of this subset and phenotypic  
408 evaluation of proliferating cells. A multivariate model analysis of predictors of the HIV  
409 reservoir decline confirmed that long-term persistence of CD45RA<sup>int</sup>RO<sup>int</sup> T<sub>SCM</sub> and  
410 differentiation of CCR5 gene-edited T<sub>SCM</sub> into T<sub>EM</sub> were associated with the reduction of  
411 HIV-infected cells. Our results suggest that the long-term decrease in HIV DNA post-  
412 infusion is a consequence of the continuous replacement of the pool of short lived T<sub>EM</sub>  
413 cells, known to be preferentially infected by R5 tropic viruses<sup>59</sup>, by the progeny of T<sub>SCM</sub>  
414 cells that have low frequencies of HIV-infected cells and hence would not replenish the

415 viral reservoir; moreover, these cells harbor CCR5 gene-edited alleles which also makes  
416 their progeny resistant to infection.

417 CD45RA<sup>+</sup> T<sub>SCM</sub> have been shown to be susceptible to *in vitro* infection<sup>60</sup> and can  
418 constitute a stable source of latent HIV reservoir<sup>61,62</sup>. A central hypothesis of our studies  
419 was that providing protection from HIV infection to a subset of CD4<sup>+</sup> T cells would  
420 provide a global benefit and allow for reduction of the latent HIV reservoir and control of  
421 viral replication.

422 We recognized that the decay in HIV DNA in the SB-728-0902 trial might be due to the  
423 *ex vivo* expansion of both CCR5 gene edited and gene unmodified T<sub>SCM</sub> cells within the  
424 infused products and that such cells would be protected *in vivo* by ART. Although several  
425 reports have described active viral replication during suppressive ART<sup>63-65</sup>, this remains a  
426 controversial subject<sup>66,67</sup>. Nonetheless, inefficient drug penetrance, impaired immune  
427 function, immune privileged sites, and release of virus through clonal proliferation of  
428 infected cells<sup>16,68</sup> have been suggested as mechanisms for viral persistence<sup>69,70</sup>.

429 Consequently, CCR5 gene editing would offer a selective advantage in the presence of  
430 ongoing viral production in potential sanctuary sites. Nevertheless, our results from the  
431 SB-728-1101 trial demonstrate an increase in the frequency of CCR5 gene-edited cells in  
432 T<sub>EM</sub> and a lack of an increase in integrated HIV DNA in that subset during active viral  
433 replication in PTCs, highlighting that differentiation of CCR5 gene-edited T<sub>SCM</sub> into  
434 other memory subsets can lead to protection from *de novo* HIV infection. This was  
435 further confirmed by long-term monitoring of the pentamer duplication marker in the  
436 absence of ART in participant 01-060 where we saw an enrichment of CCR5 gene-edited  
437 cells between years 1 and 4 post-infusion. The increase in intact proviral DNA at year 5

438 confirms ongoing viral replication. Interestingly, this individual was heterozygote for the  
439 delta-32 CCR5 gene mutation which may have resulted in a greater probability of  
440 circulating bi-allelic CCR5 deleted cells, which would represent fully protected cells. The  
441 importance of limiting HIV infection in T<sub>SCM</sub> (or T<sub>CM</sub>) cells for the preservation of CD4<sup>+</sup>  
442 T cell homeostasis was shown in non-human primates<sup>71</sup> and viremic non-progressor HIV-  
443 infected individuals<sup>72</sup>. A follow-up randomized clinical trial (NCT03666871) with a  
444 larger cohort and a control arm will further evaluate the impact of CCR5 gene  
445 modification on T cell homeostasis and reservoir decay in the absence of ATI.  
446 HIV-specific CD8<sup>+</sup> T cell function has been implicated in the control of viral replication  
447 in elite controllers<sup>73-75</sup> as well as post-ART controllers<sup>76-78</sup>. Moreover, numerous studies  
448 have shown that CD4<sup>+</sup> T cell help is crucial for CD8<sup>+</sup> T cell function<sup>79,80</sup>. Monitoring T  
449 cell responses in participant 01-060 who controlled VL to levels ~100 copies/ml showed  
450 that HIV-specific CD4<sup>+</sup> T cells producing TNF- $\alpha$  and IFN- $\gamma$  were increased during  
451 ongoing ATI and coincided with an increase in HIV-specific CD8<sup>+</sup> T cell polyfunctional  
452 responses. These results are in line with a recent study demonstrating that memory stem  
453 cell generation following vaccination in melanoma patients was associated with robust  
454 anti-tumor cell responses<sup>81</sup>. We also show in the SB-728-1101 study that HIV-specific  
455 CD8<sup>+</sup> T cell polyfunctional responses increased post-ATI and correlated with HIV viral  
456 load and levels of integrated HIV DNA in T<sub>EM</sub> cells. As only a subset of T<sub>CM</sub>, T<sub>TM</sub>, and  
457 T<sub>EM</sub> cells contain CCR5 mutations, enhanced HIV-specific CD8<sup>+</sup> T cell responses post-  
458 infusion is a mechanism that controls and potentially reduces the HIV reservoir during  
459 active viral replication.

460 In summary, our results indicate that infusion of CCR5 gene-edited cells provides a  
461 unique therapeutic intervention that improves T cell homeostasis and reduces the HIV  
462 reservoir. The less-invasive and autologous aspect of this therapy makes it more  
463 accessible than hematopoietic stem cell transplantation. Combining this approach with  
464 other interventions that enhance T<sub>SCM</sub> proliferation and differentiation post-infusion  
465 might further improve outcomes.

466

467 **Acknowledgements**

468

469 We thank the study participants for their participation in this clinical trial. We thank  
470 Filipa Blasco Tavares, Vinicius Suzart, Victor Joo, Yuwei Zhang, Franck Dupuy, and  
471 Alessandra Noto for technical assistance, Michael Cartwright, Navnita Dutta, and Petra  
472 Stafova for assistance with Illumina microarrays, as well as Malika Aid, Abdelali Filali-  
473 Mouhim, Courtney Steel and Peter Wilkinson for bioinformatics support. We are grateful  
474 to Zhong He, Yu Shi, and Kim Kusser for flow cytometric cell sorting, and to Benjamin  
475 A. Youngblood, Mirko Paiardini and Joseph M. McCune for comments on the  
476 manuscript. The work was supported by the Foundation for AIDS Research (amFAR  
477 grants # 108549-53-RGRL and 108833-55-RGRL) and the Delaney AIDS Research  
478 Enterprise to cure HIV (DARE grant # AI096109).

479 **Author contributions**

480 J.L. recruited participants into the study. D.A. oversaw the clinical trial, clinical data  
481 management and clinical operations. S.D. wrote the protocol and oversaw the clinical  
482 study with D.A. J.Z., A.S., and G.L. designed and performed experiments and analyzed  
483 data under the guidance of R.-P.S. and D.A. A.R. performed statistical analysis of HIV  
484 reservoir decay under the guidance of G.M. and J.H. R.F., F.A.P., and N.C. designed and  
485 performed HIV reservoir measurements. S.F. performed bioinformatic analysis of CCR5  
486 sequence tracking as well as multivariate model analysis. K.G., A.S., and M.A.  
487 performed bioinformatic analysis of gene array results. R.B. provided antibodies and  
488 helped with selection of Ab/fluorochrome combinations for multiparametric flow panels.  
489 G.P.S., G.C., and C.B. contributed to flow cytometry experiments and cell sorting. J.Z.  
490 and A.S. prepared the figures. J.Z., L.S., R.-P.S. and S.D. wrote the manuscript.

491 **Author information**

492 Microarray data was deposited at the GEO database (<http://www.ncbi.nlm.nih.gov/geo/>),  
493 accession number GSE66214. Reprints and permissions information is available at  
494 [www.nature.com/reprints](http://www.nature.com/reprints). The authors declare no competing financial interests. Authors  
495 affiliated with Sangamo Therapeutics are employees and investigators are paid by  
496 Sangamo to perform the trial according to FDA approved good clinical trial practices.  
497 Correspondence and requests for materials should be addressed to R.-P.S.  
498 ([rafick.sekaly@emory.edu](mailto:rafick.sekaly@emory.edu)).

499

500 **Figure 1. Identification of a novel memory stem cell CD4<sup>+</sup> T cell subset**  
501 **(CD45RA<sup>int</sup>RO<sup>int</sup> cells expressing CD95) that contributes to the persistence of CCR5**  
502 **gene-edited T cells and total CD4<sup>+</sup> T cells. a,** Bar chart depicting the mean distribution  
503 of CD45RA<sup>+</sup>RO<sup>-</sup>R7<sup>+</sup>27<sup>+</sup> cells (that include naïve and CD45RA<sup>+</sup> T<sub>SCM</sub>), T<sub>CM</sub>, T<sub>TM</sub>, T<sub>EM</sub>,  
504 and CD45RA<sup>int</sup>RO<sup>int</sup> frequencies in CD4<sup>+</sup> T cells at BL ( $n=9$ ), early (days 14-28;  $n=6$ ),  
505 mid (months 4-7,  $n=7$ , and months 9-10,  $n=7$ ), late (months 11-12,  $n=9$ ), and long-  
506 term time points (year 3-4,  $n=9$ ) post-infusion. \*  $P < 0.05$ , \*\*  $P < 0.01$ ; Wilcoxon rank-  
507 sum test. **b,** Representative example of the gating strategy used to analyze the expression  
508 of CD58 and CD95, markers upregulated by memory stem cells, in CD45RA<sup>int</sup>RO<sup>int</sup> and  
509 CD45RA<sup>+</sup>RO<sup>-</sup> subsets for participants 2-01 at BL and 6 months post SB-728-T infusion.  
510 **c,** Median frequency of the Pentamer Duplication marker per 10<sup>6</sup> cells, a specific  
511 sequence tag that accounts for approximately 25% of CCR5 gene-edited cells, measured  
512 in sorted T<sub>CM</sub>, T<sub>TM</sub>, and T<sub>EM</sub> memory subsets at d14-m4 ( $n=7$  for all 3 subsets), m6-8 ( $n$   
513 = 7, 7, and 6, respectively), m11-12 ( $n=7, 7, and 6, respectively$ ), and year 3-4 ( $n=7, 7,$   
514 and 5, respectively), and in CD45RA<sup>+</sup> T<sub>SCM</sub> and CD45RA<sup>int</sup>RO<sup>int</sup> T<sub>SCM</sub> at m9-10 ( $n=6$   
515 and 5, respectively), m11-12 ( $n=3$  and 5, respectively), and year 3-4 ( $n=7$  and 8,  
516 respectively) post-infusion. N/A = not done due to limitations in availability of  
517 cryopreserved PBMCs. **d,** Distribution of the ZFN-mediated CCR5 mutations,  
518 determined by DNA sequencing, present uniquely in CD45RA<sup>int</sup>CD45RO<sup>int</sup>  
519 CCR7<sup>+</sup>CD27<sup>+</sup> cells from SB-728-T products in CD4<sup>+</sup> T cell subsets at year 3-4 ( $n=5$ ).  
520 Box shows median, first and third quartiles, and whiskers extend to a distance of  
521 1.5\*IQR. **e-g,** *In vitro* stimulation of purified CD45RA<sup>int</sup>RO<sup>int</sup> T<sub>SCM</sub> sorted from year 3-4  
522 samples ( $n=4$ ) post-infusion with DynaBeads Human T-activator CD3/CD28.  
523 Frequency of CD45RA<sup>int</sup>RO<sup>int</sup>, CD45RA<sup>+</sup>, and CD45RO<sup>+</sup> cells in culture up to 6 days  
524 post stimulation in the different cycles of proliferation (**f**). Uniform Manifold  
525 Approximation and Projection (UMAP) dimension reduction analysis of flow cytometric  
526 phenotypic analysis of cells emerging from the CD45RA<sup>int</sup>RO<sup>int</sup> T<sub>SCM</sub> subset post  
527 stimulation, with overlays of clusters 13 (which demonstrates lowest cycling at day 6)  
528 and 6 (which demonstrates highest cycling at day 6) (**g**). Frequency of clusters 13 and 6  
529 for each proliferation cycle (1-5) and heatmap of their marker co-expression with red and  
530 blue squares indicating upregulation and down-regulation, respectively (**h**). Columns  
531 represent different cycles.

532 **Figure 2. Decay of the HIV reservoir post SB-728-T infusion correlates with**  
533 **persistence of CCR5 gene-edited cells. a,** Box-plot showing the frequency of cells  
534 harboring total HIV DNA per 10<sup>6</sup> PBMCs at baseline (BL), year 1, and year 2 post-  
535 infusion (mean decay of  $-0.6 \log_{10}$ , 95% confidence interval (CI)  $-1.19$  to  $-0.006$  at year 1  
536 and  $-0.91 \log_{10}$ , 95% confidence interval (CI)  $-1.71$  to  $-0.11$  at year 2). Box shows  
537 median, first and third quartiles, and whiskers extend to maximum and minimum values.  
538 Individual data points are shown for all 9 participants with colors corresponding to the  
539 different cohorts (cohort 1, 2 and 3 are shown in blue, green and red hues, respectively).



540 BL values for participants 1-01 and 1-02 were imputed as described in the online  
541 Methods. \*  $P < 0.05$ ; Wilcoxon rank-sum test. **b**, Frequencies of integrated HIV DNA  
542 copies per  $10^6$  purified  $CD4^+$  T cells are shown at BL and year 2-3 (long-term follow up).  
543 Participants in cohorts 1, 2 and 3 are shown in blue, green and red symbols, respectively.  
544 \*  $P < 0.05$ ; Wilcoxon rank-sum test. **c**, Correlation between the frequencies of integrated  
545 HIV DNA in  $CD4^+$  T cells and total HIV provirus assessed by the IDPA assay. **d**, 3-D  
546 scatter plot showing the change in the frequency of PBMCs harboring total HIV DNA  
547 post-infusion (Ratio of  $\log_{10}$  values at day 720 over day 0) as a function of  
548  $CD45RA^{int}RO^{int} T_{SCM}$  cell counts at years 3-4 (z-axis),  $\log_{10}$  Pentamer Duplication levels  
549 in  $CD45RA^{int}RO^{int} T_{SCM}$  at years 3-4 (x-axis), and the ratio of the frequency of Pentamer  
550 Duplication in  $CD45RA^{int}RO^{int} T_{SCM}$  by the frequency of Pentamer Duplication in  $T_{EM}$  at  
551 years 3-4 (y-axis). These features, together with  $\log_{10}$  Pentamer Duplication levels in  
552  $CD45RA^{int}RO^{int} T_{SCM}$  at year 1 (not plotted), were determined as the best predictors of  
553 reservoir decay by a sparse linear multivariate model. The multivariate regression model  
554 to predict the reservoir decay contained the following features (see Supplementary Table  
555 5):  $CD45RA^{int}RO^{int} T_{SCM}$  cell counts at years 3-4, the frequency of Pentamer Duplication  
556 in  $CD45RA^{int}RO^{int} T_{SCM}$  at multiple time points, the Ratio Pentamer Duplication  
557  $CD45RA^{int}RO^{int} T_{SCM}/T_{EM}$  at month 12 and years 3-4, the number of shared mutations  
558 between  $CD45RA^{int}RO^{int} T_{SCM}$  and  $T_{EM}$  at years 3-4. Each dot in the scatter plot  
559 corresponds to a participant, with dot size proportional to the HIV DNA day 720/BL  
560 ratio, with a greater decay (i.e., smaller ratio) symbolized by a greater dot size (adjusted  
561  $r^2 = 0.99$ , F-test:  $P = 0.0008$ ). **e**, Heatmap representing pathways expressed in  
562  $CD45RA^{int}RO^{int} T_{SCM}$  that were associated with HIV reservoir decay (ratio of  $\log_{10}$  HIV  
563 DNA values at day 720 over day 0;  $P = 0.19$ ), with the range of the outcome presented as  
564 legend below the heatmap. Rows represent pathways and columns represent samples.  
565 Red and blue correspond to up- and down-regulated pathways respectively. The range of  
566 HIV reservoir decay is presented as legends at the bottom of the heatmap.

567 **Figure 3.  $CD45RA^{int}RO^{int} T_{SCM}$  are distinct from previously identified  $CD45RA^+$**   
568  **$T_{SCM}$  cells and constitute a novel  $T_{SCM}$  subset with features of quiescent**  
569 **uncommitted and long-lived memory cells. **a****, Volcano plot of genes differentially  
570 expressed by  $CD45RA^+ T_{SCM}$  and  $CD45RA^{int}RO^{int} T_{SCM}$  at year 3-4 ( $n = 7$ ) post-infusion.  
571 **b**, SLEA plot of selected pathways significantly enriched in genes induced or repressed in  
572  $CD45RA^{int}RO^{int} T_{SCM}$  compared to  $CD45RA^+ T_{SCM}$  at year 3-4 ( $n = 7$ ) post-infusion.  
573 Scale represents SLEA score with red and blue squares indicating positive and negative  
574 enrichment respectively. Columns represent  $CD45RA^{int}RO^{int} T_{SCM}$  and  $CD45RA^+ T_{SCM}$   
575 subsets. **c**, Volcano plots illustrating the expression of the transcription factors T-bet,  
576 Eomes, ROR $\gamma$ t, and GATA-3 in  $CD4^+$  T cell subsets at year 3-4 post-infusion ( $n = 7$ ). \*  $P$   
577  $< 0.05$ ; Wilcoxon rank-sum test. **d**, Uniform Manifold Approximation and Projection  
578 (UMAP) dimension reduction analysis of flow cytometric phenotypic analysis of PBMCs  
579 at years 3-4 post infusion ( $n = 6$ ) in response to stimulation with DynaBeads Human T-

580 activator CD3/CD28. **e**, Frequency of two clusters (11 and 13) uniquely up-regulated  
581 post-stimulation and their subset distribution. **f**, Heatmap depicting the expression of  
582 markers associated with memory T cell phenotypes (CD45RA, CCR7, CD27, CD45RO,  
583 and CD95) and effector cytokines (IFN- $\gamma$ , IL-2, MIP-1 $\alpha$ , and TNF- $\alpha$ ) of clusters 11 and  
584 13, with a naïve T cell cluster (14) used as control. **g**, MFI levels of TNF- $\alpha$ , IL-2, MIP-  
585 1 $\alpha$ , and IFN- $\gamma$  shown for naïve T cells (cluster 14), T<sub>CM</sub>, and CD45RA<sup>int</sup>RO<sup>int</sup> T<sub>SCM</sub>  
586 (cluster 13) and T<sub>EM</sub> (cluster 11).

587 **Figure 4. CCR5 gene-edited CD45RA<sup>int</sup>RO<sup>int</sup> T<sub>SCM</sub> prior to ATI, levels of CCR5**  
588 **gene-edited T<sub>EM</sub> and HIV-specific CD8<sup>+</sup> T cell polyfunctionality during ATI**  
589 **correlate with control of viral load and lower reseeded of the T<sub>EM</sub> HIV reservoir. a**,  
590 Plot depicting the viral load (VL) values at week 22 (equivalent to 16 weeks of ATI) and  
591 the historic pre-ART viral set point values obtained from participants' charts. Participants  
592 with extended ATI and a reduction of week 22 VL compared to the historic pre-ART VL  
593 greater than 0.5 log are shown in red (post-treatment virologic controllers; PTCs). *P*  
594 value of Wilcoxon rank-sum test is shown. VL for all participants post-ATI are shown in  
595 Supplementary Table 9. **b**, The HIV reservoir quantified in purified CD4<sup>+</sup> T cells  
596 (integrated HIV DNA, total and intact proviral HIV DNA) after 16 weeks of ATI is  
597 shown for non-controllers (black) and PTCs (red). Lines depict means. Virological and  
598 immunological assays were performed for participants of cohort 3-5 for whom  
599 cryopreserved cells were available for analysis. **c**, Violin plot representing the frequency  
600 of CD45RA<sup>int</sup>RO<sup>int</sup> T<sub>SCM</sub> cell counts prior to ATI (week 6) in non-controllers (black) and  
601 PTCs (red). **d**, Box-plot showing the percent of ZFN-induced CCR5 mutations present  
602 uniquely in CD45RA<sup>int</sup>CD45RO<sup>int</sup> T<sub>SCM</sub> in SB-728-T products that are detected in CD4<sup>+</sup>  
603 T cell subsets at weeks 6 and 22 post-infusion (*n* = 7). Box shows median, first and third  
604 quartiles, and whiskers extend to a distance of 1.5\*IQR. Outliers are shown as dots. **e**,  
605 Violin plot representing the frequency of CCR5 gene edited alleles in T<sub>EM</sub> at week 22 in  
606 non-controllers (black) and PTCs (red) in participants of cohort 3-5. **f**, Violin plot  
607 representing the frequency of integrated HIV DNA within T<sub>EM</sub> cells at BL, week 6 and  
608 week 22 post-infusion (*n* = 7) in non-controllers (black) and PTCs (red) in participants of  
609 cohort 3-5. \* *P* < 0.05.

610 **Figure 4. Long term control of viral load for up to 5 years post infusion in**  
611 **participant 01-060.** Participant 01-060's VL (**a**), CD4<sup>+</sup> T cell counts (**b**), and Pentamer  
612 Duplication levels normalized to CD4<sup>+</sup> T cells (**c**) are shown post-infusion, post-ATI,  
613 and during long term follow up. The years 4 and 5 time point visits are highlighted in red  
614 and orange, respectively. **d**, Uniform Manifold Approximation and Projection (UMAP)  
615 dimension reduction analysis of flow cytometry phenotypic analysis of the  
616 CD45RA<sup>int</sup>RO<sup>int</sup> T<sub>SCM</sub> subset in participant 01-060, with overlays of clusters 2 and 6  
617 (which increased by week 2 post infusion and remain above BL) and 13 (which increased  
618 at years 4 and 5) **e**, Frequency of clusters 2, 6 and 13 in total CD4<sup>+</sup> T cells. **f**, Expression

619 of markers upregulated in memory stem cells (CD27, CCR7, CD127, TCF-6, and 41BB)  
620 in clusters 2, 6 and 13. **g**, Dot plot of CD4<sup>+</sup> T cells producing both IFN- $\gamma$  and TNF- $\alpha$   
621 cytokines post a 6-hour gag peptide pool stimulation in longitudinal samples from  
622 participant 01-060 (shown for week 2 and year 5). **h**, The frequency of CD4<sup>+</sup> T cells  
623 producing both IFN- $\gamma$  and TNF- $\alpha$  cytokines post a 6-hour gag peptide pool stimulation in  
624 longitudinal samples from participant 01-060 is overlaid with VL levels post ATI. **i**, Dot  
625 plot of CD8<sup>+</sup> T cells producing both IFN- $\gamma$  and TNF- $\alpha$  cytokines post a 6-hour gag  
626 peptide pool stimulation in longitudinal samples from participant 01-060 (shown for  
627 week 2 and year 5). **j**, The frequency of CD8<sup>+</sup> T cells producing both IFN- $\gamma$  and TNF- $\alpha$   
628 cytokines post a 6-hour gag peptide (GAGa ad GAGb) pool stimulation (green and  
629 orange bars, respectively; right Y axis) in longitudinal samples from participant 01-060 is  
630 overlaid with VL levels post ATI. **k**, Frequency of intact provirus as measured by the  
631 IPDA assay (purple bars; right Y axis) in longitudinal samples from participant 01-060 is  
632 overlaid with VL levels (black).

633

634

635

636

637

638

639

640

641

642

643

644

645

646

647

648 **Methods**

649

650 **Study design.** The SB-728-0902 clinical trial is a Phase 1, open label, uncontrolled,  
651 nonrandomized study of individuals with chronic HIV infection treated with ART  
652 (ClinicalTrials.gov # NCT01044654). The study was sponsored by Sangamo  
653 Therapeutics and was conducted at two centers in the United States between December  
654 2009 and April 2014. The primary objective of the study was to assess the safety and  
655 tolerability of ascending dose of autologous CD4<sup>+</sup> enriched T cells edited at the CCR5  
656 gene by ZFNs (SB-728-T cells). Secondary objectives included the assessment of  
657 increases in CD4<sup>+</sup> T cell counts, long-term persistence of CCR5 gene-edited cells,  
658 homing to gut mucosa, and the effects on HIV viral persistence (HIV RNA and proviral  
659 DNA). A total of 9 participants were enrolled into three ascending dose cohorts (Cohort 1  
660 received 10 x 10<sup>9</sup> SB-728-T, cohort 2 received 20 x 10<sup>9</sup> SB-728-T, and cohort 3 received  
661 20 x 10<sup>9</sup> SB-728-T), with three participants in each cohort (Supplementary Table 1). All  
662 participants were followed weekly for the initial 4 weeks and then monthly thereafter for  
663 one year, after which they were enrolled in a three-year safety study. Participant 1-01  
664 underwent a treatment interruption between months 12 and 22; viral load measurements  
665 are listed in Supplementary Tables 10 and 11 and ART regimens are detailed in  
666 Supplementary Table 13.

667 The SB-728-1101 clinical trial is a Phase 1, open label, uncontrolled, nonrandomized  
668 study of individuals with chronic HIV infection treated with ART (ClinicalTrials.gov  
669 #NCT01543152). The study was sponsored by Sangamo Therapeutics and was conducted  
670 at 12 centers in the United States between March 2012 and January 2017. The primary  
671 objective of the study was to evaluate the safety and tolerability of escalating doses of  
672 cyclophosphamide (CTX) pre-treatment to promote CD4<sup>+</sup> T cell expansion after  
673 administration of a single dose of SB-728-T cells. Participants received CTX at doses of  
674 0.1 (Cohort 1, *n* = 2), 0.5 (Cohort 2, *n* = 4), 1.0 (Cohort 3, *n* = 3), 1.5 (Cohort 5, *n* = 3)  
675 and 2.0 g/m<sup>2</sup> (Cohort 4, *n* = 3) one day before infusion of SB-728-T cells (Supplementary  
676 Table 14). Participants subsequently received between ~10 to 40 billion SB-728-T cells  
677 (Supplementary Table 8). All participants were followed weekly for the initial 4 weeks,  
678 bi-monthly until week 14, monthly until week 22, and then every 2 months until month  
679 12. ART was discontinued 6 weeks after SB-728-T infusion for a period of 16 weeks  
680 (Supplementary Fig. 7b). Secondary objectives included the evaluation of the effect of  
681 SB-728-T cells on plasma HIV-1 RNA levels following ART interruption. During the  
682 treatment interruption, ART was reinstated in participants whose CD4<sup>+</sup> T cell counts  
683 dropped to <500 cells/ $\mu$ L and/or whose HIV-RNA increased to >100,000 copies/mL on  
684 three consecutive weekly measurements. Following completion of the 1-year study,  
685 participants were enrolled in a 3-year long-term safety study. Adverse events are  
686 summarized in the on-line discussion.

687

688 The final clinical protocol, amendments, and consent documents were reviewed and  
689 approved by the NIH Recombinant DNA Advisory committee, as well as institutional  
690 review board and institutional biosafety committee (as required) at each study center. All  
691 participants provided written informed consent.

692

### 693 **Enrollment criteria.**

694 **SB-728-0902 Trial:** Eligible participants were 18 years of age or older and were  
695 chronically infected with HIV, as documented by ELISA. Participants were on long-term  
696 stable ART and aviremic (undetectable HIV RNA for at least one year prior to  
697 enrollment), with CD4<sup>+</sup> T cell counts between 200 and 500 cell/ $\mu$ L (immune non-  
698 responders; Supplementary Table 1) and had adequate venous access and no  
699 contraindications to leukapheresis. The key exclusion criteria included a SNP at the  
700 CCR5 ZFN target region, current or prior AIDS diagnosis, receiving therapy with  
701 maraviroc or immunosuppressives, and hepatitis B or hepatitis C co-infection.

702 **SB-728-1101 Trial:** Eligible participants were 18 years of age or older and were  
703 chronically infected with HIV, as documented by ELISA. Participants were aviremic on  
704 stable ART with CD4<sup>+</sup> T cell counts  $>500/\mu$ L, had R5 tropic HIV, and willing to  
705 discontinue current ART during the treatment interruption (Supplementary Table 14).  
706 The key exclusion criteria included adenoviral neutralizing antibodies  $>40$ , a SNP at the  
707 CCR5 ZFN target region, current or prior AIDS diagnosis, receiving therapy with  
708 maraviroc or immunosuppressives, and hepatitis B or hepatitis C co-infection.

709

710 **Cell manufacture and infusion.** Production of SB-728-T cells was previously  
711 described<sup>29,82</sup>. Briefly, participants underwent a 10L leukapheresis to collect, enrich,  
712 modify and expand autologous CD4<sup>+</sup> T cells. Manufacturing of the SB-728-T products  
713 includes a T cell activation step (with anti-CD3/anti-CD28-coated magnetic beads) and  
714 an IL-2 expansion step<sup>29</sup>. ARV drugs (Ritanovir and Norvir with or without Fuzeon) were  
715 added during manufacture to inhibit de novo infection of CD4<sup>+</sup> T cells. SB-728-T refers  
716 to autologous CD4<sup>+</sup> enriched T cells that have been transduced *ex vivo* with SB-728, a  
717 replication deficient recombinant Ad5/35 viral vector encoding the CCR5 specific ZFNs  
718 (SBS8196z and SBS8267), that includes a mixture of gene-edited and non-edited cells.  
719 Expression of CCR5-specific ZFNs induces a double stranded break in the cell's DNA  
720 which is repaired by cellular machinery leading to random sequence insertions or  
721 deletions (indels) in ~25% of transduced cells. These indels disrupt the CCR5 coding  
722 sequence leading to frameshift mutation and termination of protein expression.

723 Infusion of SB-728-T was conducted employing a standard intravenous infusion method  
724 common to all adoptive cell transfer protocols. Participants were pre-medicated with  
725 acetaminophen 650 mg P.O. and 25-50 mg Benadryl P.O. approximately 1 hour prior to  
726 infusion. Cryopreserved SB-728-T products were thawed bed-side and infused via the  
727 intravenous route using the Smartsite gravity set.

728 **Cryopreserved peripheral blood mononuclear cells (PBMCs) samples.**

729 **SB-728-0902:** PBMCs were prepared from whole blood by ficoll-hypaque density  
730 sedimentation and used cryopreserved in 10% dimethyl sulfoxide (DMSO) and 90%  
731 FBS. Availability of cryopreserved samples at different time points varied between  
732 participants; consequently, time points were grouped into early (14-28 days), mid (4-7  
733 months or 9-10 months), late (11-12 months), and long-term (2-3 or 3-4 years) post-  
734 infusion time points. Baseline samples included cryopreserved PBMCs from the initial  
735 leukapheresis (2-3 months before infusion) as well as from a small volume blood draw 1-  
736 2 weeks before infusion. PBMCs from participants 1-01, 1-02, and 1-03 were not  
737 cryopreserved until months 6 or 8 post-infusion. Most participants agreed to a large  
738 volume blood draw ( $n = 9$ , year 2-3) and a leukapheresis ( $n = 7$ , year 3-4) during the  
739 long-term follow-up period to allow for assays requiring large amounts of cells, such as  
740 CCR5 sequencing, integrated HIV DNA quantification, and gene arrays in sorted CD4<sup>+</sup> T  
741 cell subsets. For certain assays, including flow cytometry phenotyping, baseline samples  
742 for only 6 participants remained available. Manufacturing samples (SB-728-T products)  
743 were also available for all participants.

744 **SB-728-1101:** Clinical measures (CD4, CD8 counts, viral load (VL), and the Pentamer  
745 Duplication marker) were performed at every time point. Availability of cryopreserved  
746 PBMCs at baseline and pre-ATI were not available for Cohorts 1 and 2 participants;  
747 consequently immunological (T cell phenotyping, CCR5 DNA sequencing of ZFN  
748 mediated mutations in sorted CD4<sup>+</sup> subsets) and virological (Integrated HIV DNA)  
749 measurements were only performed in participants from Cohorts 3-5. Baseline samples  
750 included cryopreserved PBMCs from the initial leukapheresis (2-3 months before  
751 infusion) as well as from a small volume blood drawn 1-2 weeks before infusion.  
752 Manufacturing samples (SB-728-T products) were also available for Cohorts 3-5  
753 participants.

754

755 **Rectal and lymph node biopsies.** Rectal biopsies were performed for participants of the  
756 SB-928-0902 trial at baseline, day 14, month 3, 6 and 12 ( $n$  varied between 3 and 9  
757 participants per time point). Mucosal mononuclear cells were isolated from sigmoid  
758 colon biopsies obtained by endoscopy via a combination of collagenase digestion and  
759 teasing with 18G needles. Inguinal lymph nodes were biopsied from 3 volunteers at one  
760 time point (between 9 and 18 months) post-SB-728-T infusion. Tissues were processed  
761 into single cells as described in Anton et al<sup>83</sup> and genomic DNA were isolated for  
762 assessment of CCR5 gene modifications.

763

764 **Quantification of CCR5 gene modification in SB-728-T products using Cel-I.** The  
765 Cel-I nuclease specifically cleaves DNA duplexes at the sites of distortions created by  
766 either bulges or mismatches in the double helical DNA structure. We have adapted  
767 protocols using this enzyme for quantification of minor indels typically induced by ZFN-

768 mediated gene modifications. Briefly, the genomic region of interest (CCR5) is PCR  
769 amplified, the PCR product is denatured and then allowed to re-anneal to permit wild  
770 type and non-homologous end joining-edited alleles to re-anneal together and create  
771 hetero-duplexes. The re-annealed PCR products are then digested with the Cel-I nuclease  
772 to cut the PCR-amplified DNA at the site of mismatches. Subsequently, the level of ZFN-  
773 mediated gene modification can be quantified by determining the ratio of the uncleaved  
774 parental fragment to the two lower migrating cleaved products.

775

776 **Quantification of CCR5 gene-edited CD4<sup>+</sup> T cells by Polymerase Chain Reaction.**  
777 ZFN-mediated gene modification can generate a wide range of frame-shift mutations to  
778 disrupt the CCR5 gene locus. A PCR-based assay was developed to measure the  
779 acquisition of a unique duplication of 5-nucleotide (Pentamer) DNA sequence, CTGAT,  
780 at the ZFN cleavage site in approximately 25% of the gene-edited alleles<sup>29</sup>. Genomic  
781 DNA (gDNA) was extracted from PBMCs using a commercially available kit  
782 (Masterpure DNA Purification kit, Epicenter, Madison, WI). A standard PCR was  
783 performed with 5µg of gDNA to amplify a 1.1 kb region that contains CCR5 gene  
784 modifications. This 1.1 kb amplicon is subsequently evaluated with the two independent  
785 qPCRs, one specific for the Pentamer Duplication- CCR5 gene-edited allele (by using a  
786 primer that contains the Pentamer Duplication), and a second that amplifies all CCR5  
787 alleles. The ratio of Pentamer Duplication-specific templates and the total number of  
788 CCR5 alleles yields Pentamer Duplications per 1 million PBMCs. The assay has a  
789 sensitivity of one CCR5 gene-edited allele per 10<sup>5</sup> total CCR5 alleles. As the Pentamer  
790 Duplication markers represents ~25% of ZFN-mediated gene modifications, the total  
791 frequency of CCR5 gene-edited cells in PBMCs was estimated by multiplying the  
792 frequency of Pentamer Duplication gene-edited cells by 4.

793

794 **Estimation of expansion of SB-728-T post-infusion.** The level of CCR5 gene-edited  
795 alleles present in a participant post-infusion relative to the amount infused can be  
796 estimated using the measured values of CCR5 modification by the Pentamer Duplication  
797 marker and CD4<sup>+</sup> cell count with the assumptions; 1) blood volume is 4.7 liters, 2)  
798 approximately 2.5% of all CD4<sup>+</sup> T cells are found in the periphery<sup>84</sup> and 3) SB-728-T  
799 products distribution is similar to endogenous CD4<sup>+</sup> T cells (levels of CCR5 modification  
800 in CD4<sup>+</sup> T cells from the sigmoid and inguinal nodes are similar to that in the periphery,  
801 Supplementary Fig. 4).

Engraftment of SB-728-T

$$= \frac{(\% \text{ CD4 with the Pentamer Duplication marker}) \times (\text{CD4 count}) \times (\text{blood volume}) \times \frac{1}{2.5\%}}{(\% \text{ SB-728-T with the Pentamer Duplication maker}) \times (\text{Total SB-728-T infused})}$$

802

803

804 **Quantification of CCR5 gene modification via next-generation sequencing/MiSeq.**  
805 The locus of interest (ZFN binding sites in CCR5) was PCR amplified from genomic

806 DNA, and the levels of modification at each locus were determined by paired-end deep  
807 sequencing on an Illumina MiSeq sequencer. Paired sequences were merged via SeqPrep  
808 (John St. John, <https://github.com/jstjohn/SeqPrep>, unpublished). A Needleman-Wunsch  
809 alignment was performed between the target amplicon genomic region and the obtained  
810 Illumina sequence to map indels<sup>85</sup>. CCR5 sequencing was performed in sorted CD4<sup>+</sup> T  
811 cell subsets from SB-728-0902 participants in SB-728-T products ( $n = 9$ ) and year 3-4  
812 samples ( $n = 8$ ) as well as from SB-728-1101 Cohorts 3-5 participants in SB-728-T  
813 products ( $n = 7$ ) and weeks 6 and 22 samples ( $n = 7$ ). Perez *et al.*, had shown that  
814 approximately 30% of CCR5 gene modifications were bi-allelic<sup>29</sup>. For simplicity, CCR5  
815 gene-edited memory subset cell counts were estimated by multiplying each memory  
816 subset cell count by the frequency of CCR5 gene-edited alleles within each memory  
817 subset as determined by CCR5 DNA-Seq, thereby assuming that one gene-edited allele is  
818 equivalent to one cell.

819

#### 820 **Cell tracking of CCR5 gene-edited CD45RA<sup>int</sup>RO<sup>int</sup> T<sub>SCM</sub> post SB-728-T infusion.**

821 Sequencing of CCR5 ZFN-mediated mutations in sorted CD4<sup>+</sup> T cell subsets was used to  
822 track differentiation of CD45RA<sup>int</sup>RO<sup>int</sup> T<sub>SCM</sub> cells post-infusion. First, wild type CCR5  
823 (amplicon) and sequences detected in only 1 of the samples sequenced were excluded  
824 from further analysis (~80% of unique CCR5 sequences). Then, for each participant, we  
825 identified the sequences expressed only in CD45RA<sup>int</sup>RO<sup>int</sup> T<sub>SCM</sub> cells in SB-728-T  
826 products and then analyzed their distribution in CD4<sup>+</sup> T cell memory subsets at year 3-4  
827 samples (SB-728-0902) or weeks 6 and 22 samples (SB-728-1101).

828

#### 829 **Flow cytometry analysis.**

830 **Surface staining.** Two surface panels were run for longitudinal analysis of CD4<sup>+</sup> T cell  
831 distribution in SB-728-T products and post-infusion, including a T<sub>SCM</sub> panel (Figs. 1a,c  
832 and 4c, and Supplementary Fig. 3), using previously titrated monoclonal antibodies  
833 summarized in Supplementary Table 8. Thawed PBMCs (1-2 million cells) were labelled  
834 for 30 minutes in the dark at 4°C, washed with staining buffer (PBS, 2% FBS), fixed with  
835 2% FA (Sigma Aldrich) for 15 min at 22°C, and resuspended in staining buffer for  
836 acquisition. A minimum of 100,000 live cells were acquired within 24hrs using a BD  
837 LSR-II or BD LSRFortessa™ cell analyzer and analyzed using the FlowJo version 9  
838 software (TreeStar, Ashland, OR). Longitudinal samples from each participant were  
839 stained in the same batch run and a common set of control cells (obtained from an  
840 independent ART-treated HIV-infected donor) was stained when samples from different  
841 participants were stained in separate runs.

842 **Intracellular Cytokine Staining (ICS).** A transcription factor panel (Supplementary  
843 Table 8) was used to determine Th-lineage in CD4<sup>+</sup> T cell subsets in the SB-728-0902  
844 study (Fig. 3c). Thawed PBMCs were labelled with surface antibodies for 30 minutes at  
845 4°C prior to fixation with eBioscience's Foxp3 Fixation/Permeabilization buffer for 30



846 minutes at 4°C. Cells were then labelled with the intracellular antibodies for 30 minutes  
847 at 22°C in eBioscience's Foxp3 permeabilization buffer, resuspended in staining buffer  
848 (PBS, 2% FBS), and immediately acquired using a BD LSRFortessa™ flow cytometer.  
849 An ICS panel (Supplementary Table 8) was used to quantify effector cytokine production  
850 in CD4<sup>+</sup> T cell subsets following T cell stimulation (Fig. 3d-g) or gag peptide pool  
851 stimulation (Fig. 4g-j and Supplementary Fig. 9). Cells were labelled with surface  
852 antibodies, and permeabilised with Perm buffer (BD Bioscience) after which cells were  
853 stained intracellularly prior to fixation with 2% formaldehyde. Cells were acquired within  
854 24 hours using a BD LSR-II or BD LSRFortessa™. A minimum of 500,000 live events  
855 was acquired. Longitudinal samples were stained in the same batch run. Cells were  
856 analyzed using FlowJo version 10.

857 Additional intracellular panels were used to further characterize the stemness of the  
858 CD45RA<sup>int</sup>RO<sup>int</sup> subset and CD8<sup>+</sup> T cell activation and exhaustion (Fig 4d-f and  
859 Supplementary Fig. 10) in longitudinal samples from participant 01-060 (Supplementary  
860 Table 8).

861 Cell proliferation and stemness/effector phenotype progression of *in vitro* stimulated  
862 CD45RA<sup>int</sup>RO<sup>int</sup> T<sub>SCM</sub> (Fig. 1e-h and Supplementary Fig. 4) was determined by  
863 measuring the progressive dilution of CellTrace Violet (Thermo Fisher Scientific)  
864 combined with an intracellular panel (Supplementary Table 8).

865 **Uniform Manifold Approximation and Projection (UMAP) Analysis of flow**  
866 **cytometry panels.** Live CD3<sup>+</sup>CD4<sup>+</sup> cells (Figs. 1e-h, 3d-g, and Supplementary Fig. 4),  
867 live CD4<sup>+</sup>CD45RA<sup>int</sup>RO<sup>int</sup> cells (Fig. 5d-f and Supplementary Fig. 8c-e), or live  
868 CD3<sup>+</sup>CD4<sup>-</sup>CD8<sup>+</sup> T cells (Supplementary Fig. 10) were gated and exported for unbiased  
869 clustering analyses. For these panels, projection of the density of cells expressing markers  
870 of interest were visualized/plotted on a 2-dimensional UMAP  
871 (<https://arxiv.org/abs/1802.03426>, <https://github.com/lmcinnes/umap>). Clusters of cells  
872 were identified using the RPhenograph package  
873 (<https://github.com/jacoblevine/PhenoGraph>) after concatenating all samples per panel  
874 and bi-exponentially transforming each marker. The K value, indicating the number of  
875 nearest neighbors, was set to 60. Data were visualized using FlowJo version 10 and R for  
876 heatmaps highlighting differences in MFI for each marker per cluster.

877

878

879 **Cell culture and stimulation conditions.** Thawed PBMCs were rested in RPMI 1640  
880 medium supplemented with 10% FBS and 1% penicillin–streptomycin for 12 hours. To  
881 induce cytokine production, 2 million cells were activated with dynabeads human T  
882 activator CD3/CD28 at a 1:1 bead to cell ratio (Thermo Fisher Scientific), Staphylococcal  
883 enterotoxin B (SEB; 1µg/mL) (Toxin Technology), Phorbol myristate acetate (PMA)  
884 (100 ng/mL) and Ionomycin (1µg/mL) (both from Sigma Aldrich), or only complete  
885 media (mock) for 6 hours in the presence of Brefeldin A (5µg/mL) (Sigma Aldrich). In a

886 separate experiment, thawed PBMCs were rested for 12 hours prior to stimulation of 2  
887 million cells with either gag peptide pool (GAGa and b pools; 1µg/mL; NIH AIDS  
888 reagent program), Staphylococcal enterotoxin B (SEB; 1µg/mL) (Toxin Technology),  
889 CEF control peptide pool (SB-728-1101 study only: 1µg/mL; NIH AIDS reagent  
890 program), or only complete media (mock) for 6 hours in the presence of Brefeldin A  
891 (5µg/mL) (Sigma Aldrich).

892

893

894 **HIV DNA in PBMCs, total and sorted CD4<sup>+</sup> T cell subsets.** Total HIV DNA in  
895 PBMCs was measured by droplet digital polymerase chain reaction. In brief, genomic  
896 DNA (gDNA) was extracted from PBMCs using a commercially available kit  
897 (Masterpure DNA Purification kit, Epicenter, Madison, WI). 2 µg of gDNA was digested  
898 with the restriction enzyme DdeI at 37°C for 1 hour. PCR droplets were prepared  
899 according to manufacturer's recommendations. Briefly, a 20µL of multiplex PCR mixture  
900 is prepared by mixing 250 or 500 ng of the digested gDNA with the ddPCR™ 2x Master  
901 Mix and two Taqman primer/probe sets. The Taqman primer/probe sets amplify a  
902 conserved region in *gag* (as described by Palmer *et. al.*, HIV *gag* forward  
903 CATGTTTTTCAGCATTATCAGAAGGA, HIV *gag* reverse  
904 TGCTTGATGTCCCCCACT, HIV *gag* probe, FAM-CCACCCCA  
905 CAAGATTTAAACACCATGCTAA-BHQ) and the human Ribonuclease P protein  
906 subunit p30 (RPP30 forward GATTTGGACCTGCGAGCG, RPP30 reverse  
907 GCGGCTGTCTCCACAAGT, RPP30 probe VIC-CTGACCTGAAGGCTCT-MGB-  
908 BHQ)<sup>86</sup>. PCR droplets were generated in a DG8™ cartridge using the QX-100 droplet  
909 generator, where each 20µL PCR mixture was partitioned into approximately 15,000  
910 nano-liter size droplets. PCR droplets were transferred into a 96-well PCR plate and  
911 sealed with foil. Standard PCR was performed with a Bio-Rad C1000 Thermal Cycler  
912 (95°C (60sec), 40 cycles of 94°C (30sec)/ 60°C (60sec), 98°C (600 sec)). HIV DNA copy  
913 number was evaluated using the QX-100 Droplet Digital PCR system (Bio-Rad,  
914 Hercules, CA). The PCR-positive and PCR-negative droplets for HIV *gag* and RPP30  
915 were determined and template concentrations were calculated by Poisson analysis. HIV  
916 copy number was determined by normalizing HIV *gag* concentration to RPP30  
917 concentration<sup>86</sup>. Integrated DNA was measured as previously described<sup>87</sup> in purified  
918 CD4<sup>+</sup> T cells from SB-728-0902 participants at baseline, in SB-728-T products, year 2-3  
919 samples (*n* = 9) and in sorted CD4<sup>+</sup> T cell subsets in SB-728-T products and year 3-4  
920 samples (*n* = 8). Integrated DNA was also measured in purified CD4<sup>+</sup> T cells as well as  
921 sorted CD4<sup>+</sup> T cell subsets from SB-728-1101 Cohorts 3-5 participants in baseline, weeks  
922 2-6 and 14-22 samples (*n* = 8).

923

924 **HIV Tropism Assay.** HIV Tropism was evaluated using the commercial Trofile® DNA  
925 assay (Monogram BioSciences/ LabCorp, South San Francisco, CA). Viral envelope

926 DNA sequence was extracted from PBMCs. HIV tropism is determined using a cell-  
927 based transduction assay where HIV env protein sequences are amplified from PBMC  
928 samples, subcloned as a library, packaged into lentiviral vectors, and evaluated using co-  
929 receptor restricted cell lines.

930

931 **T cell Receptor (TCR) Repertoire.** TCR repertoire analysis was performed with the  
932 immunoSEQ assay (Adaptive Biotechnologies, Seattle, WA). The immunoSEQ method  
933 amplifies rearranged TCR CDR3 sequences by multiplex PCR to explore all V $\beta$  and J $\beta$   
934 combinations from isolated genomic DNA and uses high-throughput sequencing  
935 technology to sequence TCR CDR3 chains to determine the composition of various T cell  
936 clones within each sample. TCR diversity is assessed using the Shannon entropy  
937 index<sup>33,88</sup>, which accounts for both the number of unique clones (richness) and clone  
938 distribution (evenness) of the TCR V $\beta$  CDR3 sequences present in each sample. A larger  
939 Shannon entropy index reflects a more diverse distribution of the TCR V $\beta$  CDR3  
940 sequences.

941

942 **Cell sorting.** For quantification of the Pentamer Duplication maker, CCR5 gene-edited  
943 alleles using DNA-Seq, and levels of integrated HIV DNA within CD4<sup>+</sup> T cell subsets,  
944 CD4<sup>+</sup> T cells were first isolated from PBMCs by negative magnetic selection (StemCell),  
945 and then surface stained with CD3 Alexa 700 (clone UCHT1), CD95 PE-Cy7 (clone  
946 DX2), CD58 PE (clone 1C3), CD127 BV421 (clone HIL-7R-M21), CD28 APC (clone  
947 CD28.2), CD14 V500 (clone M5E2) (all from BD Biosciences), CD4 Qdot 605 (clone  
948 S3.5) (Invitrogen), CD27 APCe780 (clone O323) (eBioscience), CD45RA BV 650 (clone  
949 HI100), CD45RO PerCPe710 (clone UCHL1), CD19 BV 510 (clone H1B19) (all from  
950 Biologend), CCR7 FITC (clone 150503) (R&D), aqua fluorescent reactive dye  
951 (Invitrogen), and CD8 PerCP (clone SK1) from Biologend (SB-728-0902 study) or CD8  
952 BV711 (clone RPA-T8) from BD (SB-728-1101 study). Up to 200,000 total CD4<sup>+</sup> T cells  
953 as well as CD4<sup>+</sup> T cell subsets were then sorted with the FACS Aria (Becton Dickinson)  
954 and stored as dry pellets at -80°C until analysis. For gene array analysis of CD4<sup>+</sup> T cell  
955 subsets in the SB-728-0902 study, 10,000 sorted cells (naïve, CD45RA<sup>+</sup> T<sub>SCM</sub>,  
956 CD45RA<sup>int</sup>RO<sup>int</sup> T<sub>SCM</sub>, T<sub>CM</sub>, and T<sub>EM</sub>) were collected directly into RNase-free 1.5mL  
957 eppendorf tubes containing 500 $\mu$ L of RLT buffer with 1%  $\beta$ -mercaptoethanol and stored  
958 at -80°C until analysis.

959

960 **Gene Microarray and Analyses.** Sorted CD4<sup>+</sup> memory subsets from year 3-4 samples  
961 were sorted into RLT buffer as described above and included naïve, CD45RA<sup>+</sup> T<sub>SCM</sub>,  
962 CD45RA<sup>int</sup>RO<sup>int</sup> T<sub>SCM</sub>, T<sub>CM</sub>, and T<sub>EM</sub> cells. Sorted cells were lysed for RNA extraction as  
963 per manufacturer's instructions (Qiagen, Valencia, CA). T7 oligo(dT) primed reverse  
964 transcription reactions were performed followed by *in vitro* transcription. These products  
965 underwent a second round of amplification (MessageAmp II aRNA Amplification kit by

966 Life Technologies) yielding biotin-labeled aRNAs which were hybridized to the Illumina  
967 Human HT-12 version 4 Expression BeadChip according to the manufacturer's  
968 instructions and quantified using an Illumina iScan System.

969 Analysis of gene array output data was conducted using the R statistical  
970 language (<http://www.r-project.org/>)<sup>89</sup> and the Linear Models for Microarray Data  
971 (LIMMA) statistical package<sup>90</sup> from Bioconductor<sup>91</sup>. Briefly, scanned array images were  
972 inspected for artifacts and unusual signal distribution within chips, and arrays with low  
973 overall intensity or variability were removed from analysis. Diagnostic plots such as  
974 density plots, box plots, and heatmaps of between-array distances were used to assess  
975 hybridization quality across chips. Intensities were log<sub>2</sub> transformed before being  
976 normalized using the quantile normalization method<sup>92</sup>. Probes that did not map to  
977 annotated RefSeq genes and control probes were removed. The LIMMA package was  
978 used to fit a linear model to each probe and perform a moderated Student's *t*-test to assess  
979 the difference in gene expression level between the different subsets. For data mining and  
980 functional analyses, genes that satisfied a *P* value < 0.05 were selected. The proportions  
981 of false positives were controlled using the Benjamini and Hochberg method<sup>93</sup>. All  
982 microarray data have been deposited in GEO under accession number GSE66214.

983 We performed Gene Set Enrichment Analysis (GSEA)<sup>94</sup> using MSigDB  
984 (<http://software.broadinstitute.org/gsea/msigdb/>) curated gene sets to identify enriched  
985 biological pathways that are modulated in CD45RA<sup>int</sup>RO<sup>int</sup> T<sub>SCM</sub> compared to the  
986 CD45RA<sup>+</sup> T<sub>SCM</sub> subset. GSEA is a statistical method to determine whether members of a  
987 particular gene set preferentially occur toward the top or bottom of a ranked-ordered gene  
988 list where genes are ranked by the strength of their association with the outcome of  
989 interest. More specifically, GSEA calculates an enrichment score (NES) that reflects the  
990 degree to which a set of genes is overrepresented among genes differently expressed. The  
991 significance of an observed NES is obtained by permutation testing: resorting the gene  
992 list to determine how often an observed NES occurs by chance. Leading Edge analysis is  
993 performed to examine the particular genes of a gene set contributing the most to the  
994 enrichment. We discarded gene sets with a false discovery rate (FDR) > 25% and a  
995 nominal *P* value > 0.05.

996 We used linear regression analysis to identify genes in CD45RA<sup>int</sup>RO<sup>int</sup> T<sub>SCM</sub> that  
997 correlated with the HIV reservoir decay (Ratio of total HIV DNA (log<sub>10</sub>)/10<sup>6</sup> PBMC at  
998 day 720 over day 0). We fit a linear model (using R language) between each of the genes  
999 and the levels of these outcomes as continuous variables and used GSEA to associate a  
1000 pathway positively or negatively with both of the readouts (Fig. 2e, 3b, and  
1001 Supplementary Tables 6 and 7).

## 1002 **Statistical Analysis.**

1003 **Clinical data (CD4 counts, CD4:CD8 ratio, HIV DNA), CCR5 modification, and**  
1004 **flow cytometry analysis:** The paired Wilcoxon rank-sum two-tailed test was used to  
1005 perform non-parametric donor-paired two-sided analysis to assess the significance of  
1006 post-infusion changes in total CD4<sup>+</sup> T cell counts, CD4:CD8 ratio, CD4<sup>+</sup> T cell subset  
1007 frequencies and counts, and frequency of total and integrated HIV DNA per 10<sup>6</sup> cells  
1008 compared to baseline in the SB-728-0902 study. Missing HIV DNA baseline values for  
1009 participants 1-01 and 1-02 were estimated by the linear regression model fit intercept.  
1010 The paired Wilcoxon rank-sum two-tailed test was also used to assess the significance of  
1011 post-ATI changes in CD4<sup>+</sup> T cell subset frequencies and counts compared to pre-ATI  
1012 (week 6) and changes in integrated HIV DNA compared to baseline and pre-ATI (week  
1013 6) in the SB-728-1101 study. The Wilcoxon rank-sum two-tailed test was also used to  
1014 compare the frequency of CCR5 gene-edited alleles, obtained by DNA-Seq, in CD4<sup>+</sup> T  
1015 cell memory subsets to that of CD45RA<sup>int</sup>RO<sup>int</sup> T<sub>SCM</sub> in SB-728-T products and post-  
1016 infusion samples in the SB-728-0902 and SB-728-1101 studies, as well as to compare the  
1017 levels of transcription factors in CD4<sup>+</sup> T cell memory subsets to those in CD45RA<sup>int</sup>RO<sup>int</sup>  
1018 T<sub>SCM</sub> post-infusion, and the frequency of integrated HIV DNA in CD4<sup>+</sup> T cell memory  
1019 subsets to that of CD45RA<sup>int</sup>RO<sup>int</sup> T<sub>SCM</sub> in SB-728-T products and post-infusion samples  
1020 in the SB-728-0902 study. The Wilcoxon rank-sum two-tailed test was also used to  
1021 compare the diversity of CCR5 gene-edited alleles between SB-738-T products and long-  
1022 term time points in each CD4<sup>+</sup> T cell memory subset. The Mann-Whitney two-tailed test  
1023 was used to perform unpaired non-parametric two-sided comparisons in instances where  
1024 the number of matched participants varied across time points and contained less than 6  
1025 matched pairs at a given time point, such as for the frequencies of CD95<sup>+</sup> cells post-  
1026 infusion compared to baseline. A *P* value < 0.05 was considered significant. Statistical  
1027 analysis was performed using GraphPad Prism v7.0.  
1028 The Spearman's rho ( $\rho$ ) test was used to perform non-parametric correlation analysis to  
1029 assess the relationship between various measures (e.g., CCR5 gene-edited cells and CD4<sup>+</sup>  
1030 T cell subset frequencies and/or counts) and clinical outcomes, including delta CD4<sup>+</sup> T  
1031 cell counts post-infusion (SB-728-0902), change in the size of the reservoir calculated  
1032 using the ratio of year 2 values over baseline post-infusion (SB-728-0902), HIV-specific  
1033 CD8<sup>+</sup> T cell effector function post-infusion (SB-728-1101), and control of viral  
1034 replication post-ATI (SB-728-1101). We controlled for multiple comparison testing by  
1035 calculating the false discovery rate (FDR) value using the original FDR method of  
1036 Benjamini and Hochberg<sup>93</sup>. FDR values are provided in Table 1 and Supplementary  
1037 Table 3. A *P* value < 0.05 and a *Q* value < 0.25 were considered significant. These  
1038 statistical analyses were performed using GraphPad Prism v7.0.  
1039 **Multivariate analysis:** A sparse linear multivariate regression model was built to  
1040 identify features that predict the change in the frequency HIV-infected cells using the  
1041 "reduction of total HIV DNA in PBMCs between year 2 and baseline" as dependent  
1042 variable and CD45RA<sup>int</sup>RO<sup>int</sup> T<sub>SCM</sub> cell counts at year 3-4, frequency of Pentamer

1043 Duplication mutations in CD45RA<sup>int</sup>RO<sup>int</sup> T<sub>SCM</sub> post-infusion, ratio of the frequency of  
1044 Pentamer Duplication in CD45RA<sup>int</sup>RO<sup>int</sup> T<sub>SCM</sub> over the frequency of Pentamer  
1045 Duplication in T<sub>EM</sub> at years 3-4, and the number of shared mutations between  
1046 CD45RA<sup>int</sup>RO<sup>int</sup> T<sub>SCM</sub> and T<sub>EM</sub> as possible independent variables. Features used, and  
1047 their values are detailed in Supplementary Table 5. The K-nearest neighbor function  
1048 implemented in the R package ‘impute’ (v1.54.0) was used to infer missing values.  
1049 Default options (k=10) were used. The feature included in the multivariate model were  
1050 selected by using the LASSO technique as implemented in the R package ‘glmnet’.  
1051 Briefly, the subsets of independent variable minimizing the mean-squared-error was  
1052 optimized by leave-one-out-cross-validation. The final multivariate model was built on  
1053 the entire cohort using the features selected using the LASSO technique. Student *t*-test  
1054 was used to test that the regression coefficient of the independent variables of the final  
1055 model was statistically different from zero. R-squared value was used to assess the  
1056 proportion of the dependent variable variance explained by the multivariate model.

1057

1058

1059

1060

1061

1062

1063

1064

1065

1066

1067

1068

1069

1070

1071

1072

1073

1074

1075

1076

1077

1078

1079 **References**

- 1080 1 Kelley, C. F. *et al.* Incomplete peripheral CD4+ cell count restoration in HIV-infected  
1081 patients receiving long-term antiretroviral treatment. *Clin Infect Dis* **48**, 787-794,  
1082 doi:10.1086/597093 (2009).
- 1083 2 Lederman, M. M., Funderburg, N. T., Sekaly, R. P., Klatt, N. R. & Hunt, P. W. Residual  
1084 immune dysregulation syndrome in treated HIV infection. *Advances in immunology*  
1085 **119**, 51-83, doi:10.1016/B978-0-12-407707-2.00002-3 (2013).
- 1086 3 Lederman, M. M. *et al.* Immunologic failure despite suppressive antiretroviral  
1087 therapy is related to activation and turnover of memory CD4 cells. *J Infect Dis* **204**,  
1088 1217-1226, doi:10.1093/infdis/jir507 (2011).
- 1089 4 Pinzone, M. R., Di Rosa, M., Cacopardo, B. & Nunnari, G. HIV RNA suppression and  
1090 immune restoration: can we do better? *Clin Dev Immunol* **2012**, 515962,  
1091 doi:10.1155/2012/515962 (2012).
- 1092 5 Yanik, E. L. *et al.* Incidence and timing of cancer in HIV-infected individuals following  
1093 initiation of combination antiretroviral therapy. *Clin Infect Dis* **57**, 756-764,  
1094 doi:10.1093/cid/cit369 (2013).
- 1095 6 Serrano-Villar, S. *et al.* HIV-infected individuals with low CD4/CD8 ratio despite  
1096 effective antiretroviral therapy exhibit altered T cell subsets, heightened CD8+ T cell  
1097 activation, and increased risk of non-AIDS morbidity and mortality. *PLoS pathogens*  
1098 **10**, e1004078, doi:10.1371/journal.ppat.1004078 (2014).
- 1099 7 Achhra, A. C., Petoumenos, K. & Law, M. G. Relationship between CD4 cell count and  
1100 serious long-term complications among HIV-positive individuals. *Curr Opin HIV AIDS*  
1101 **9**, 63-71, doi:10.1097/COH.000000000000017 (2014).
- 1102 8 Freiberg, M. S. *et al.* HIV infection and the risk of acute myocardial infarction. *JAMA*  
1103 *Intern Med* **173**, 614-622, doi:10.1001/jamainternmed.2013.3728 (2013).
- 1104 9 Hocqueloux, L. *et al.* Long-term antiretroviral therapy initiated during primary HIV-  
1105 1 infection is key to achieving both low HIV reservoirs and normal T cell counts. *J*  
1106 *Antimicrob Chemother* **68**, 1169-1178, doi:10.1093/jac/dks533 (2013).
- 1107 10 Pinzone, M. R. *et al.* Monitoring Integration over Time Supports a Role for Cytotoxic  
1108 T Lymphocytes and Ongoing Replication as Determinants of Reservoir Size. *J Virol*  
1109 **90**, 10436-10445, doi:10.1128/JVI.00242-16 (2016).
- 1110 11 Chun, T. W. *et al.* Presence of an inducible HIV-1 latent reservoir during highly active  
1111 antiretroviral therapy. *Proceedings of the National Academy of Sciences of the United*  
1112 *States of America* **94**, 13193-13197 (1997).
- 1113 12 Finzi, D. *et al.* Identification of a reservoir for HIV-1 in patients on highly active  
1114 antiretroviral therapy. *Science* **278**, 1295-1300 (1997).
- 1115 13 Wong, J. K. *et al.* Recovery of replication-competent HIV despite prolonged  
1116 suppression of plasma viremia. *Science* **278**, 1291-1295 (1997).
- 1117 14 Chomont, N. *et al.* HIV reservoir size and persistence are driven by T cell survival  
1118 and homeostatic proliferation. *Nat Med* **15**, 893-900, doi:10.1038/nm.1972 (2009).

- 1119 15 Wagner, T. A. *et al.* HIV latency. Proliferation of cells with HIV integrated into cancer  
1120 genes contributes to persistent infection. *Science* **345**, 570-573,  
1121 doi:10.1126/science.1256304 (2014).
- 1122 16 Maldarelli, F. *et al.* HIV latency. Specific HIV integration sites are linked to clonal  
1123 expansion and persistence of infected cells. *Science* **345**, 179-183,  
1124 doi:10.1126/science.1254194 (2014).
- 1125 17 Casazza, J. P. *et al.* Therapeutic vaccination expands and improves the function of the  
1126 HIV-specific memory T-cell repertoire. *J Infect Dis* **207**, 1829-1840,  
1127 doi:10.1093/infdis/jit098 (2013).
- 1128 18 Shive, C. L. *et al.* Inflammation Perturbs the IL-7 Axis, Promoting Senescence and  
1129 Exhaustion that Broadly Characterize Immune Failure in Treated HIV Infection. *J*  
1130 *Acquir Immune Defic Syndr* **71**, 483-492, doi:10.1097/QAI.0000000000000913  
1131 (2016).
- 1132 19 Nakanjako, D. *et al.* High T-cell immune activation and immune exhaustion among  
1133 individuals with suboptimal CD4 recovery after 4 years of antiretroviral therapy in  
1134 an African cohort. *BMC Infect Dis* **11**, 43, doi:10.1186/1471-2334-11-43 (2011).
- 1135 20 Boulassel, M. R. *et al.* CD4 T cell nadir independently predicts the magnitude of the  
1136 HIV reservoir after prolonged suppressive antiretroviral therapy. *J Clin Virol* **53**, 29-  
1137 32, doi:10.1016/j.jcv.2011.09.018 (2012).
- 1138 21 Hutter, G. *et al.* Long-term control of HIV by CCR5 Delta32/Delta32 stem-cell  
1139 transplantation. *N Engl J Med* **360**, 692-698, doi:10.1056/NEJMoa0802905 (2009).
- 1140 22 Allers, K. *et al.* Evidence for the cure of HIV infection by CCR5Delta32/Delta32 stem  
1141 cell transplantation. *Blood* **117**, 2791-2799, doi:10.1182/blood-2010-09-309591  
1142 (2011).
- 1143 23 Walter, E. A. *et al.* Reconstitution of cellular immunity against cytomegalovirus in  
1144 recipients of allogeneic bone marrow by transfer of T-cell clones from the donor. *N*  
1145 *Engl J Med* **333**, 1038-1044, doi:10.1056/NEJM199510193331603 (1995).
- 1146 24 Heslop, H. E. *et al.* Long-term restoration of immunity against Epstein-Barr virus  
1147 infection by adoptive transfer of gene-modified virus-specific T lymphocytes. *Nature*  
1148 *medicine* **2**, 551-555 (1996).
- 1149 25 Koenig, S. *et al.* Transfer of HIV-1-specific cytotoxic T lymphocytes to an AIDS  
1150 patient leads to selection for mutant HIV variants and subsequent disease  
1151 progression. *Nature medicine* **1**, 330-336 (1995).
- 1152 26 Levine, B. L. *et al.* Adoptive transfer of costimulated CD4+ T cells induces expansion  
1153 of peripheral T cells and decreased CCR5 expression in HIV infection. *Nature*  
1154 *medicine* **8**, 47-53, doi:10.1038/nm0102-47 (2002).
- 1155 27 Mitsuyasu, R. T. *et al.* Prolonged survival and tissue trafficking following adoptive  
1156 transfer of CD4zeta gene-modified autologous CD4(+) and CD8(+) T cells in human  
1157 immunodeficiency virus-infected subjects. *Blood* **96**, 785-793 (2000).
- 1158 28 Deeks, S. G. *et al.* A phase II randomized study of HIV-specific T-cell gene therapy in  
1159 subjects with undetectable plasma viremia on combination antiretroviral therapy.  
1160 *Mol Ther* **5**, 788-797, doi:10.1006/mthe.2002.0611 (2002).
- 1161 29 Perez, E. E. *et al.* Establishment of HIV-1 resistance in CD4+ T cells by genome  
1162 editing using zinc-finger nucleases. *Nature biotechnology* **26**, 808-816,  
1163 doi:10.1038/nbt1410 (2008).
- 1164 30 Tebas, P. *et al.* Gene editing of CCR5 in autologous CD4 T cells of persons infected  
1165 with HIV. *N Engl J Med* **370**, 901-910, doi:10.1056/NEJMoa1300662 (2014).
- 1166 31 Gattinoni, L. *et al.* A human memory T cell subset with stem cell-like properties. *Nat*  
1167 *Med* **17**, 1290-1297, doi:10.1038/nm.2446 (2011).



- 1168 32 Lugli, E. *et al.* Identification, isolation and in vitro expansion of human and  
1169 nonhuman primate T stem cell memory cells. *Nat Protoc* **8**, 33-42,  
1170 doi:10.1038/nprot.2012.143 (2013).
- 1171 33 Robert, L. *et al.* CTLA4 blockade broadens the peripheral T-cell receptor repertoire.  
1172 *Clin Cancer Res* **20**, 2424-2432, doi:10.1158/1078-0432.CCR-13-2648 (2014).
- 1173 34 Becht, E. *et al.* Dimensionality reduction for visualizing single-cell data using UMAP.  
1174 *Nat Biotechnol*, doi:10.1038/nbt.4314 (2018).
- 1175 35 Cieri, N. *et al.* IL-7 and IL-15 instruct the generation of human memory stem T cells  
1176 from naive precursors. *Blood* **121**, 573-584, doi:10.1182/blood-2012-05-431718  
1177 (2013).
- 1178 36 Gattinoni, L. *et al.* Wnt signaling arrests effector T cell differentiation and generates  
1179 CD8+ memory stem cells. *Nat Med* **15**, 808-813, doi:10.1038/nm.1982 (2009).
- 1180 37 Yang, C. Y. *et al.* The transcriptional regulators Id2 and Id3 control the formation of  
1181 distinct memory CD8+ T cell subsets. *Nat Immunol* **12**, 1221-1229,  
1182 doi:10.1038/ni.2158 (2011).
- 1183 38 Ji, Y. *et al.* Repression of the DNA-binding inhibitor Id3 by Blimp-1 limits the  
1184 formation of memory CD8+ T cells. *Nat Immunol* **12**, 1230-1237,  
1185 doi:10.1038/ni.2153 (2011).
- 1186 39 Okoye, A. *et al.* Progressive CD4+ central memory T cell decline results in CD4+  
1187 effector memory insufficiency and overt disease in chronic SIV infection. *J Exp Med*  
1188 **204**, 2171-2185, doi:10.1084/jem.20070567 (2007).
- 1189 40 Canoui, E. *et al.* A Subset of Extreme Human Immunodeficiency Virus (HIV)  
1190 Controllers Is Characterized by a Small HIV Blood Reservoir and a Weak T-Cell  
1191 Activation Level. *Open Forum Infect Dis* **4**, ofx064, doi:10.1093/ofid/ofx064 (2017).
- 1192 41 Miura, T. *et al.* HLA-B57/B\*5801 human immunodeficiency virus type 1 elite  
1193 controllers select for rare gag variants associated with reduced viral replication  
1194 capacity and strong cytotoxic T-lymphocyte [corrected] recognition. *J Virol* **83**,  
1195 2743-2755, doi:10.1128/JVI.02265-08 (2009).
- 1196 42 Jansen, C. A. *et al.* High responsiveness of HLA-B57-restricted Gag-specific CD8+ T  
1197 cells in vitro may contribute to the protective effect of HLA-B57 in HIV-infection. *Eur*  
1198 *J Immunol* **35**, 150-158, doi:10.1002/eji.200425487 (2005).
- 1199 43 van Lunzen, J. *et al.* Transfer of autologous gene-modified T cells in HIV-infected  
1200 patients with advanced immunodeficiency and drug-resistant virus. *Molecular*  
1201 *therapy : the journal of the American Society of Gene Therapy* **15**, 1024-1033,  
1202 doi:10.1038/mt.sj.6300124 (2007).
- 1203 44 Tebas, P. *et al.* Antiviral effects of autologous CD4 T cells genetically modified with a  
1204 conditionally replicating lentiviral vector expressing long antisense to HIV. *Blood*  
1205 **121**, 1524-1533, doi:10.1182/blood-2012-07-447250 (2013).
- 1206 45 Riddell, S. R. *et al.* T-cell mediated rejection of gene-modified HIV-specific cytotoxic  
1207 T lymphocytes in HIV-infected patients. *Nat Med* **2**, 216-223, doi:10.1038/nm0296-  
1208 216 (1996).
- 1209 46 Zhen, A. *et al.* HIV-specific Immunity Derived From Chimeric Antigen Receptor-  
1210 engineered Stem Cells. *Mol Ther* **23**, 1358-1367, doi:10.1038/mt.2015.102 (2015).
- 1211 47 Besson, G. J. *et al.* HIV-1 DNA decay dynamics in blood during more than a decade of  
1212 suppressive antiretroviral therapy. *Clin Infect Dis* **59**, 1312-1321,  
1213 doi:10.1093/cid/ciu585 (2014).
- 1214 48 Tsai, P. *et al.* In vivo analysis of the effect of panobinostat on cell-associated HIV RNA  
1215 and DNA levels and latent HIV infection. *Retrovirology* **13**, 36, doi:10.1186/s12977-  
1216 016-0268-7 (2016).

- 1217 49 Archin, N. M. *et al.* HIV-1 expression within resting CD4+ T cells after multiple doses  
1218 of vorinostat. *J Infect Dis* **210**, 728-735, doi:10.1093/infdis/jiu155 (2014).
- 1219 50 Archin, N. M. *et al.* Administration of vorinostat disrupts HIV-1 latency in patients on  
1220 antiretroviral therapy. *Nature* **487**, 482-485, doi:10.1038/nature11286 (2012).
- 1221 51 Elliott, J. H. *et al.* Activation of HIV transcription with short-course vorinostat in HIV-  
1222 infected patients on suppressive antiretroviral therapy. *PLoS pathogens* **10**,  
1223 e1004473, doi:10.1371/journal.ppat.1004473 (2014).
- 1224 52 Leth, S. *et al.* Combined effect of Vacc-4x, recombinant human granulocyte  
1225 macrophage colony-stimulating factor vaccination, and romidepsin on the HIV-1  
1226 reservoir (REDUC): a single-arm, phase 1B/2A trial. *Lancet HIV* **3**, e463-472,  
1227 doi:10.1016/S2352-3018(16)30055-8 (2016).
- 1228 53 Alvarez-Fernandez, C., Escriba-Garcia, L., Vidal, S., Sierra, J. & Briones, J. A short  
1229 CD3/CD28 costimulation combined with IL-21 enhance the generation of human  
1230 memory stem T cells for adoptive immunotherapy. *J Transl Med* **14**, 214,  
1231 doi:10.1186/s12967-016-0973-y (2016).
- 1232 54 Gattinoni, L., Speiser, D. E., Lichterfeld, M. & Bonini, C. T memory stem cells in health  
1233 and disease. *Nat Med* **23**, 18-27, doi:10.1038/nm.4241 (2017).
- 1234 55 Biasco, L. *et al.* In vivo tracking of T cells in humans unveils decade-long survival and  
1235 activity of genetically modified T memory stem cells. *Sci Transl Med* **7**, 273ra213,  
1236 doi:10.1126/scitranslmed.3010314 (2015).
- 1237 56 Etzrodt, M., Endeke, M. & Schroeder, T. Quantitative single-cell approaches to stem  
1238 cell research. *Cell Stem Cell* **15**, 546-558, doi:10.1016/j.stem.2014.10.015 (2014).
- 1239 57 Kuo, C. Y. *et al.* Site-Specific Gene Editing of Human Hematopoietic Stem Cells for X-  
1240 Linked Hyper-IgM Syndrome. *Cell Rep* **23**, 2606-2616,  
1241 doi:10.1016/j.celrep.2018.04.103 (2018).
- 1242 58 Long, J. *et al.* Characterization of Gene Alterations following Editing of the beta-  
1243 Globin Gene Locus in Hematopoietic Stem/Progenitor Cells. *Molecular therapy: the*  
1244 *journal of the American Society of Gene Therapy* **26**, 468-479,  
1245 doi:10.1016/j.ymthe.2017.11.001 (2018).
- 1246 59 Nie, C. *et al.* Selective infection of CD4+ effector memory T lymphocytes leads to  
1247 preferential depletion of memory T lymphocytes in R5 HIV-1-infected humanized  
1248 NOD/SCID/IL-2R $\gamma$ mannull mice. *Virology* **394**, 64-72,  
1249 doi:10.1016/j.virol.2009.08.011 (2009).
- 1250 60 Flynn, J. K. *et al.* Quantifying susceptibility of CD4+ stem memory T-cells to infection  
1251 by laboratory adapted and clinical HIV-1 strains. *Viruses* **6**, 709-726,  
1252 doi:10.3390/v6020709 (2014).
- 1253 61 Buzon, M. J. *et al.* HIV-1 persistence in CD4+ T cells with stem cell-like properties.  
1254 *Nat Med* **20**, 139-142, doi:10.1038/nm.3445 (2014).
- 1255 62 Jaafoura, S. *et al.* Progressive contraction of the latent HIV reservoir around a core of  
1256 less-differentiated CD4(+) memory T Cells. *Nat Commun* **5**, 5407,  
1257 doi:10.1038/ncomms6407 (2014).
- 1258 63 Palmer, S. *et al.* Low-level viremia persists for at least 7 years in patients on  
1259 suppressive antiretroviral therapy. *Proceedings of the National Academy of Sciences*  
1260 *of the United States of America* **105**, 3879-3884, doi:10.1073/pnas.0800050105  
1261 (2008).
- 1262 64 Sahu, G. K., Sarria, J. C. & Cloyd, M. W. Recovery of replication-competent residual  
1263 HIV-1 from plasma of a patient receiving prolonged, suppressive highly active  
1264 antiretroviral therapy. *J Virol* **84**, 8348-8352, doi:10.1128/JVI.00362-10 (2010).

- 1265 65 Buzon, M. J. *et al.* HIV-1 replication and immune dynamics are affected by raltegravir  
1266 intensification of HAART-suppressed subjects. *Nature medicine* **16**, 460-465,  
1267 doi:10.1038/nm.2111 (2010).
- 1268 66 van Zyl, G., Bale, M. J. & Kearney, M. F. HIV evolution and diversity in ART-treated  
1269 patients. *Retrovirology* **15**, 14, doi:10.1186/s12977-018-0395-4 (2018).
- 1270 67 Cartwright, E. K. *et al.* CD8(+) Lymphocytes Are Required for Maintaining Viral  
1271 Suppression in SIV-Infected Macaques Treated with Short-Term Antiretroviral  
1272 Therapy. *Immunity* **45**, 656-668, doi:10.1016/j.immuni.2016.08.018 (2016).
- 1273 68 Simonetti, F. R. *et al.* Clonally expanded CD4+ T cells can produce infectious HIV-1 in  
1274 vivo. *Proceedings of the National Academy of Sciences of the United States of America*  
1275 **113**, 1883-1888, doi:10.1073/pnas.1522675113 (2016).
- 1276 69 Fletcher, C. V. *et al.* Persistent HIV-1 replication is associated with lower  
1277 antiretroviral drug concentrations in lymphatic tissues. *Proceedings of the National*  
1278 *Academy of Sciences of the United States of America* **111**, 2307-2312,  
1279 doi:10.1073/pnas.1318249111 (2014).
- 1280 70 Lorenzo-Redondo, R. *et al.* Persistent HIV-1 replication maintains the tissue  
1281 reservoir during therapy. *Nature* **530**, 51-56, doi:10.1038/nature16933 (2016).
- 1282 71 Paiardini, M. *et al.* Low levels of SIV infection in sooty mangabey central memory  
1283 CD4(+) T cells are associated with limited CCR5 expression. *Nature medicine* **17**,  
1284 830-836, doi:10.1038/nm.2395 (2011).
- 1285 72 Klatt, N. R. *et al.* Limited HIV infection of central memory and stem cell memory  
1286 CD4+ T cells is associated with lack of progression in viremic individuals. *PLoS*  
1287 *pathogens* **10**, e1004345, doi:10.1371/journal.ppat.1004345 (2014).
- 1288 73 Noel, N. *et al.* Long-Term Spontaneous Control of HIV-1 Is Related to Low Frequency  
1289 of Infected Cells and Inefficient Viral Reactivation. *J Virol* **90**, 6148-6158,  
1290 doi:10.1128/JVI.00419-16 (2016).
- 1291 74 O'Connell, K. A. *et al.* Control of HIV-1 in elite suppressors despite ongoing  
1292 replication and evolution in plasma virus. *J Virol* **84**, 7018-7028,  
1293 doi:10.1128/JVI.00548-10 (2010).
- 1294 75 O'Connell, K. A., Hegarty, R. W., Siliciano, R. F. & Blankson, J. N. Viral suppression of  
1295 multiple escape mutants by de novo CD8(+) T cell responses in a human  
1296 immunodeficiency virus-1 infected elite suppressor. *Retrovirology* **8**, 63,  
1297 doi:10.1186/1742-4690-8-63 (2011).
- 1298 76 Bailey, J. R., Brennan, T. P., O'Connell, K. A., Siliciano, R. F. & Blankson, J. N. Evidence  
1299 of CD8+ T-cell-mediated selective pressure on human immunodeficiency virus type  
1300 1 nef in HLA-B\*57+ elite suppressors. *J Virol* **83**, 88-97, doi:10.1128/JVI.01958-08  
1301 (2009).
- 1302 77 Conway, J. M. & Perelson, A. S. Post-treatment control of HIV infection. *Proc Natl*  
1303 *Acad Sci U S A* **112**, 5467-5472, doi:10.1073/pnas.1419162112 (2015).
- 1304 78 Shan, L. *et al.* Stimulation of HIV-1-specific cytolytic T lymphocytes facilitates  
1305 elimination of latent viral reservoir after virus reactivation. *Immunity* **36**, 491-501,  
1306 doi:10.1016/j.immuni.2012.01.014 (2012).
- 1307 79 Matloubian, M., Concepcion, R. J. & Ahmed, R. CD4+ T cells are required to sustain  
1308 CD8+ cytotoxic T-cell responses during chronic viral infection. *J Virol* **68**, 8056-8063  
1309 (1994).
- 1310 80 Aubert, R. D. *et al.* Antigen-specific CD4 T-cell help rescues exhausted CD8 T cells  
1311 during chronic viral infection. *Proceedings of the National Academy of Sciences of the*  
1312 *United States of America* **108**, 21182-21187, doi:10.1073/pnas.1118450109 (2011).

- 1313 81 Gannon, P. O. *et al.* Rapid and Continued T-Cell Differentiation into Long-term  
1314 Effector and Memory Stem Cells in Vaccinated Melanoma Patients. *Clin Cancer Res*  
1315 **23**, 3285-3296, doi:10.1158/1078-0432.CCR-16-1708 (2017).
- 1316 82 Maier, D. A. *et al.* Efficient clinical scale gene modification via zinc finger nuclease-  
1317 targeted disruption of the HIV co-receptor CCR5. *Human gene therapy* **24**, 245-258,  
1318 doi:10.1089/hum.2012.172 (2013).
- 1319 83 Anton, P. A. *et al.* Enhanced levels of functional HIV-1 co-receptors on human  
1320 mucosal T cells demonstrated using intestinal biopsy tissue. *AIDS* **14**, 1761-1765  
1321 (2000).
- 1322 84 Ganusov, V. V. & De Boer, R. J. Do most lymphocytes in humans really reside in the  
1323 gut? *Trends in immunology* **28**, 514-518, doi:10.1016/j.it.2007.08.009 (2007).
- 1324 85 Needleman, S. B. & Wunsch, C. D. A general method applicable to the search for  
1325 similarities in the amino acid sequence of two proteins. *Journal of molecular biology*  
1326 **48**, 443-453 (1970).
- 1327 86 Anton, P. A. *et al.* Sensitive and reproducible quantitation of mucosal HIV-1 RNA and  
1328 DNA viral burden in patients with detectable and undetectable plasma viral HIV-1  
1329 RNA using endoscopic biopsies. *Journal of virological methods* **95**, 65-79 (2001).
- 1330 87 Vandergeeten, C. *et al.* Cross-clade ultrasensitive PCR-based assays to measure HIV  
1331 persistence in large-cohort studies. *J Virol* **88**, 12385-12396,  
1332 doi:10.1128/JVI.00609-14 (2014).
- 1333 88 Shannon, C. E. The mathematical theory of communication. 1963. *M.D. computing :*  
1334 *computers in medical practice* **14**, 306-317 (1997).
- 1335 89 The R Development Core Team. *R: A Language and Environment for Statistical*  
1336 *Computing.* (R Foundation for Statistical Computing, 2010).
- 1337 90 Smyth, G. K. in *Bioinformatics and Computational Biology Solutions using R and*  
1338 *Bioconductor* (Springer, 2005).
- 1339 91 Gentleman, R. C. *et al.* Bioconductor: open software development for computational  
1340 biology and bioinformatics. *Genome Biol* **5**, R80, doi:10.1186/gb-2004-5-10-r80  
1341 (2004).
- 1342 92 Bolstad, B. M., Irizarry, R. A., Astrand, M. & Speed, T. P. A comparison of  
1343 normalization methods for high density oligonucleotide array data based on  
1344 variance and bias. *Bioinformatics* **19**, 185-193 (2003).
- 1345 93 Benjamini, Y. & Hochberg, Y. Controlling the False Discovery Rate: A Practical and  
1346 Powerful Approach to Multiple Testing. *Journal of the Royal Statistical Society. Series*  
1347 *B (Methodological)* **57**, 289-300 (1995).
- 1348 94 Subramanian, A. *et al.* Gene set enrichment analysis: a knowledge-based approach  
1349 for interpreting genome-wide expression profiles. *Proceedings of the National*  
1350 *Academy of Sciences of the United States of America* **102**, 15545-15550,  
1351 doi:10.1073/pnas.0506580102 (2005).

1352

1353

**Table 1. Correlation of increase in circulating CD4<sup>+</sup> T cell subsets (delta cell count compared to BL) at early (day 14), mid (month 4-7), late (month 11-12) and long-term time points (years 3-4) with immune reconstitution (delta CD4<sup>+</sup> count compared to BL) at the same time points.**

|                                                                     |                                                                                                                 | Spearman rank correlation $\rho$ | <i>P</i> value | q value (FDR) | <i>n</i> |
|---------------------------------------------------------------------|-----------------------------------------------------------------------------------------------------------------|----------------------------------|----------------|---------------|----------|
| Delta CD4 <sup>+</sup> count (cell/ $\mu$ L)<br><b>days 14-28</b>   | Delta CD45RA <sup>+</sup> CD45RO <sup>-</sup> CCR7 <sup>+</sup> CD27 <sup>+</sup> (cell/ $\mu$ L) <b>d14-28</b> | 0.7714                           | 0.1028         | 0.1645        | 6        |
|                                                                     | Delta Total CD45RA <sup>int</sup> RO <sup>int</sup> (cell/ $\mu$ L) <b>d14-28</b>                               | 0.7714                           | 0.2972         | 0.3963        | 6        |
|                                                                     | Delta T <sub>CM</sub> (cell/ $\mu$ L) <b>d14-28</b>                                                             | 0.9429                           | 0.0167*        | 0.0668*       | 6        |
|                                                                     | Delta T <sub>TM</sub> (cell/ $\mu$ L) <b>d14-28</b>                                                             | 1                                | 0.0028*        | 0.0224*       | 6        |
|                                                                     | Delta T <sub>EM</sub> (cell/ $\mu$ L) <b>d14-28</b>                                                             | 0.8286                           | 0.0583         | 0.1104        | 6        |
| Delta CD4 <sup>+</sup> count (cell/ $\mu$ L)<br><b>months 4-7</b>   | Delta CD45RA <sup>+</sup> CD45RO <sup>-</sup> CCR7 <sup>+</sup> CD27 <sup>+</sup> (cell/ $\mu$ L) <b>m4-7</b>   | 0.7857                           | 0.0279*        | 0.0744*       | 8        |
|                                                                     | Delta Total CD45RA <sup>int</sup> RO <sup>int</sup> (cell/ $\mu$ L) <b>m4-7</b>                                 | 0.6905                           | 0.0694         | 0.1190        | 8        |
|                                                                     | Delta T <sub>CM</sub> (cell/ $\mu$ L) <b>m4-7</b>                                                               | 0.8333                           | 0.0154*        | 0.0668*       | 8        |
|                                                                     | Delta T <sub>TM</sub> (cell/ $\mu$ L) <b>m4-7</b>                                                               | 0.7619                           | 0.0368*        | 0.0803*       | 8        |
|                                                                     | Delta T <sub>EM</sub> (cell/ $\mu$ L) <b>m4-7</b>                                                               | 0.1667                           | 0.7033         | 0.7788        | 8        |
| Delta CD4 <sup>+</sup> count (cell/ $\mu$ L)<br><b>months 11-12</b> | Delta CD45RA <sup>+</sup> CD45RO <sup>-</sup> CCR7 <sup>+</sup> CD27 <sup>+</sup> (cell/ $\mu$ L) <b>m11-12</b> | 0.75                             | 0.0255*        | 0.0744*       | 9        |
|                                                                     | Delta Total CD45RA <sup>int</sup> RO <sup>int</sup> (cell/ $\mu$ L) <b>m11-12</b>                               | 0.8667                           | 0.0045*        | 0.0270*       | 9        |
|                                                                     | Delta T <sub>CM</sub> (cell/ $\mu$ L) <b>m11-12</b>                                                             | 0.9                              | 0.0020*        | 0.0224*       | 9        |
|                                                                     | Delta T <sub>TM</sub> (cell/ $\mu$ L) <b>m11-12</b>                                                             | 0.75                             | 0.0255*        | 0.0744*       | 9        |
|                                                                     | Delta T <sub>EM</sub> (cell/ $\mu$ L) <b>m11-12</b>                                                             | 0.2833                           | 0.4630         | 0.5556        | 9        |
| Delta CD4 <sup>+</sup> count (cell/ $\mu$ L)<br><b>years 3-4</b>    | Delta CD45RA <sup>+</sup> CD45RO <sup>-</sup> CCR7 <sup>+</sup> CD27 <sup>+</sup> (cell/ $\mu$ L) <b>yr3-4</b>  | 0.6611                           | 0.0598         | 0.1104        | 9        |
|                                                                     | Delta Total CD45RA <sup>int</sup> RO <sup>int</sup> (cell/ $\mu$ L) <b>yr3-4</b>                                | 0.887                            | 0.0025*        | 0.0224*       | 9        |
|                                                                     | Delta T <sub>CM</sub> (cell/ $\mu$ L) <b>yr3-4</b>                                                              | 0.477                            | 0.1974         | 0.2787        | 9        |
|                                                                     | Delta T <sub>TM</sub> (cell/ $\mu$ L) <b>yr3-4</b>                                                              | 0.3347                           | 0.3738         | 0.4722        | 9        |
|                                                                     | Delta T <sub>EM</sub> (cell/ $\mu$ L) <b>yr3-4</b>                                                              | -0.03347                         | 0.9374         | 0.9374        | 9        |
|                                                                     | Delta naive (cell/ $\mu$ L) <b>yr3-4</b>                                                                        | -0.2000                          | 0.7139         | 0.7788        | 6        |
|                                                                     | Delta CD45RA <sup>+</sup> T <sub>SCM</sub> (cell/ $\mu$ L) <b>yr3-4</b>                                         | 0.7143                           | 0.1361         | 0.2042        | 6        |
|                                                                     | Delta CD45RA <sup>int</sup> RO <sup>int</sup> T <sub>SCM</sub> (cell/ $\mu$ L) <b>yr3-4</b>                     | 0.8857                           | 0.0333*        | 0.0799*       | 6        |
|                                                                     | Delta CD45RA <sup>int</sup> RO <sup>int</sup> CD95 <sup>-</sup> (cell/ $\mu$ L) <b>yr3-4</b>                    | 0.1429                           | 0.8028         | 0.8377        | 6        |

\* Significant correlations with *P* < 0.05 and false discovery rate (FDR) < 0.25

CD45RA<sup>+</sup>CD45RO<sup>-</sup>CCR7<sup>+</sup>CD27<sup>+</sup> cells include naïve (CD95<sup>-</sup>) and CD45RA<sup>+</sup> T<sub>SCM</sub> (CD95<sup>+</sup>) cells

CD45RA<sup>int</sup>RO<sup>int</sup> cells are defined as CD45RA<sup>int</sup> and CD45RO<sup>int</sup>

T<sub>CM</sub> cells are defined as CD45RA<sup>-</sup>, CD45RO<sup>+</sup>, CCR7<sup>+</sup>, and CD27<sup>+</sup>

T<sub>TM</sub> cells are defined as CD45RA<sup>-</sup>, CD45RO<sup>+</sup>, CCR7<sup>-</sup>, and CD27<sup>+</sup>

T<sub>EM</sub> cells are defined as CD45RA<sup>-</sup>, CD45RO<sup>+</sup>, CCR7<sup>-</sup>, and CD27<sup>-</sup>

CD45RA<sup>int</sup>RO<sup>int</sup> T<sub>SCM</sub> are defined as CD45RA<sup>int</sup>, CD45RO<sup>int</sup>, CCR7<sup>+</sup>, CD27<sup>+</sup>, CD127<sup>+</sup>, CD28<sup>+</sup>, CD58<sup>+</sup>, and CD95<sup>+</sup>

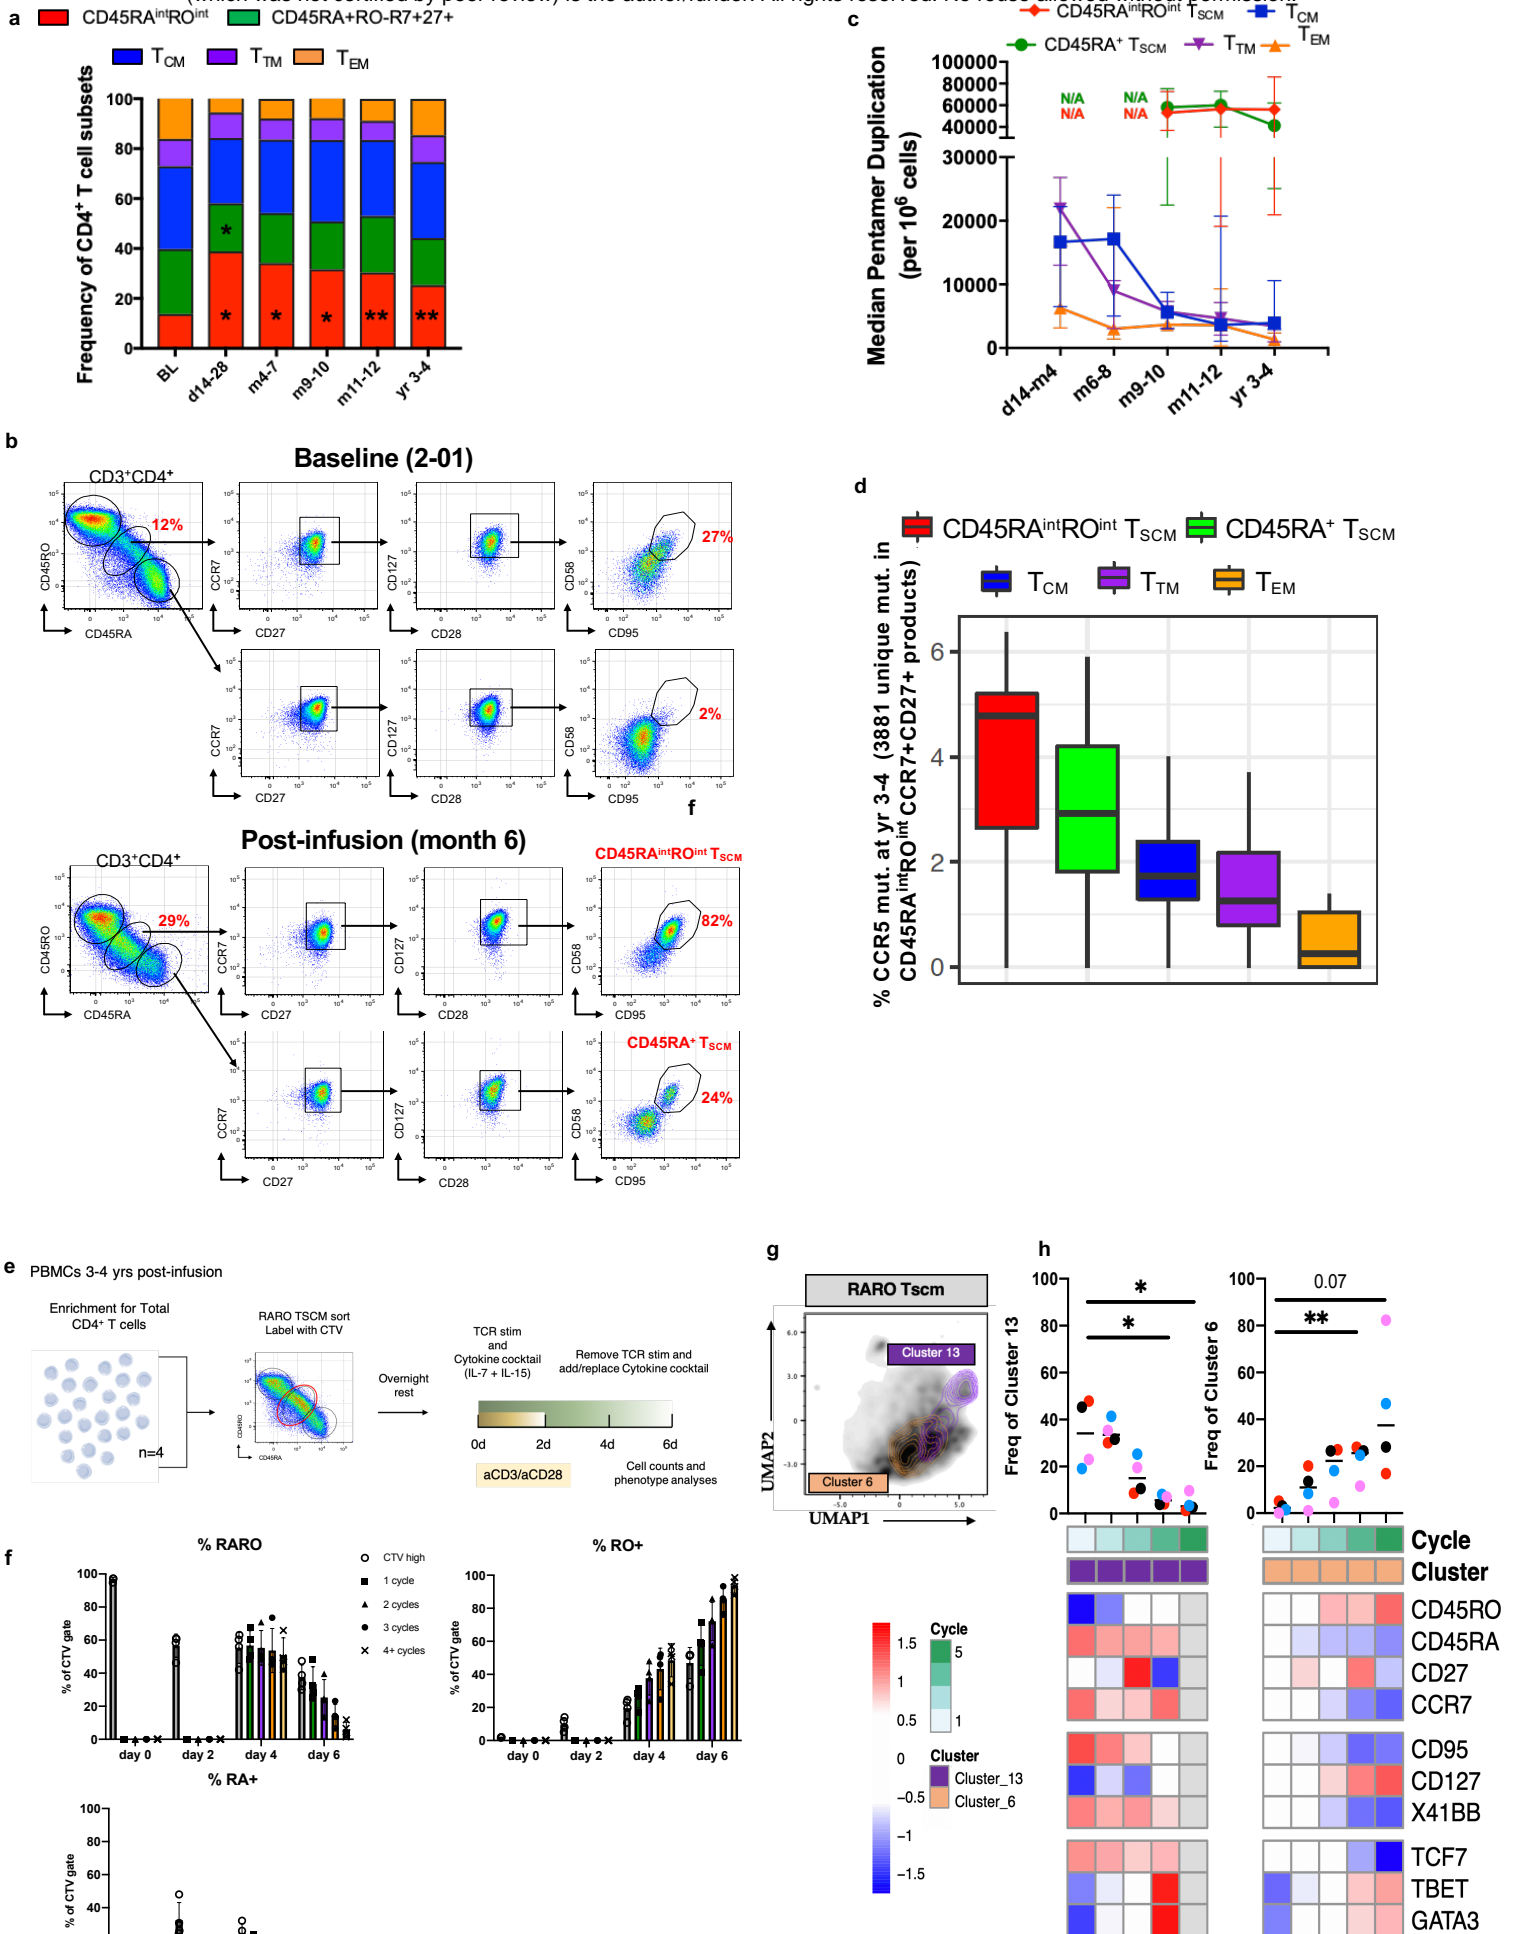

**Fig. 1**

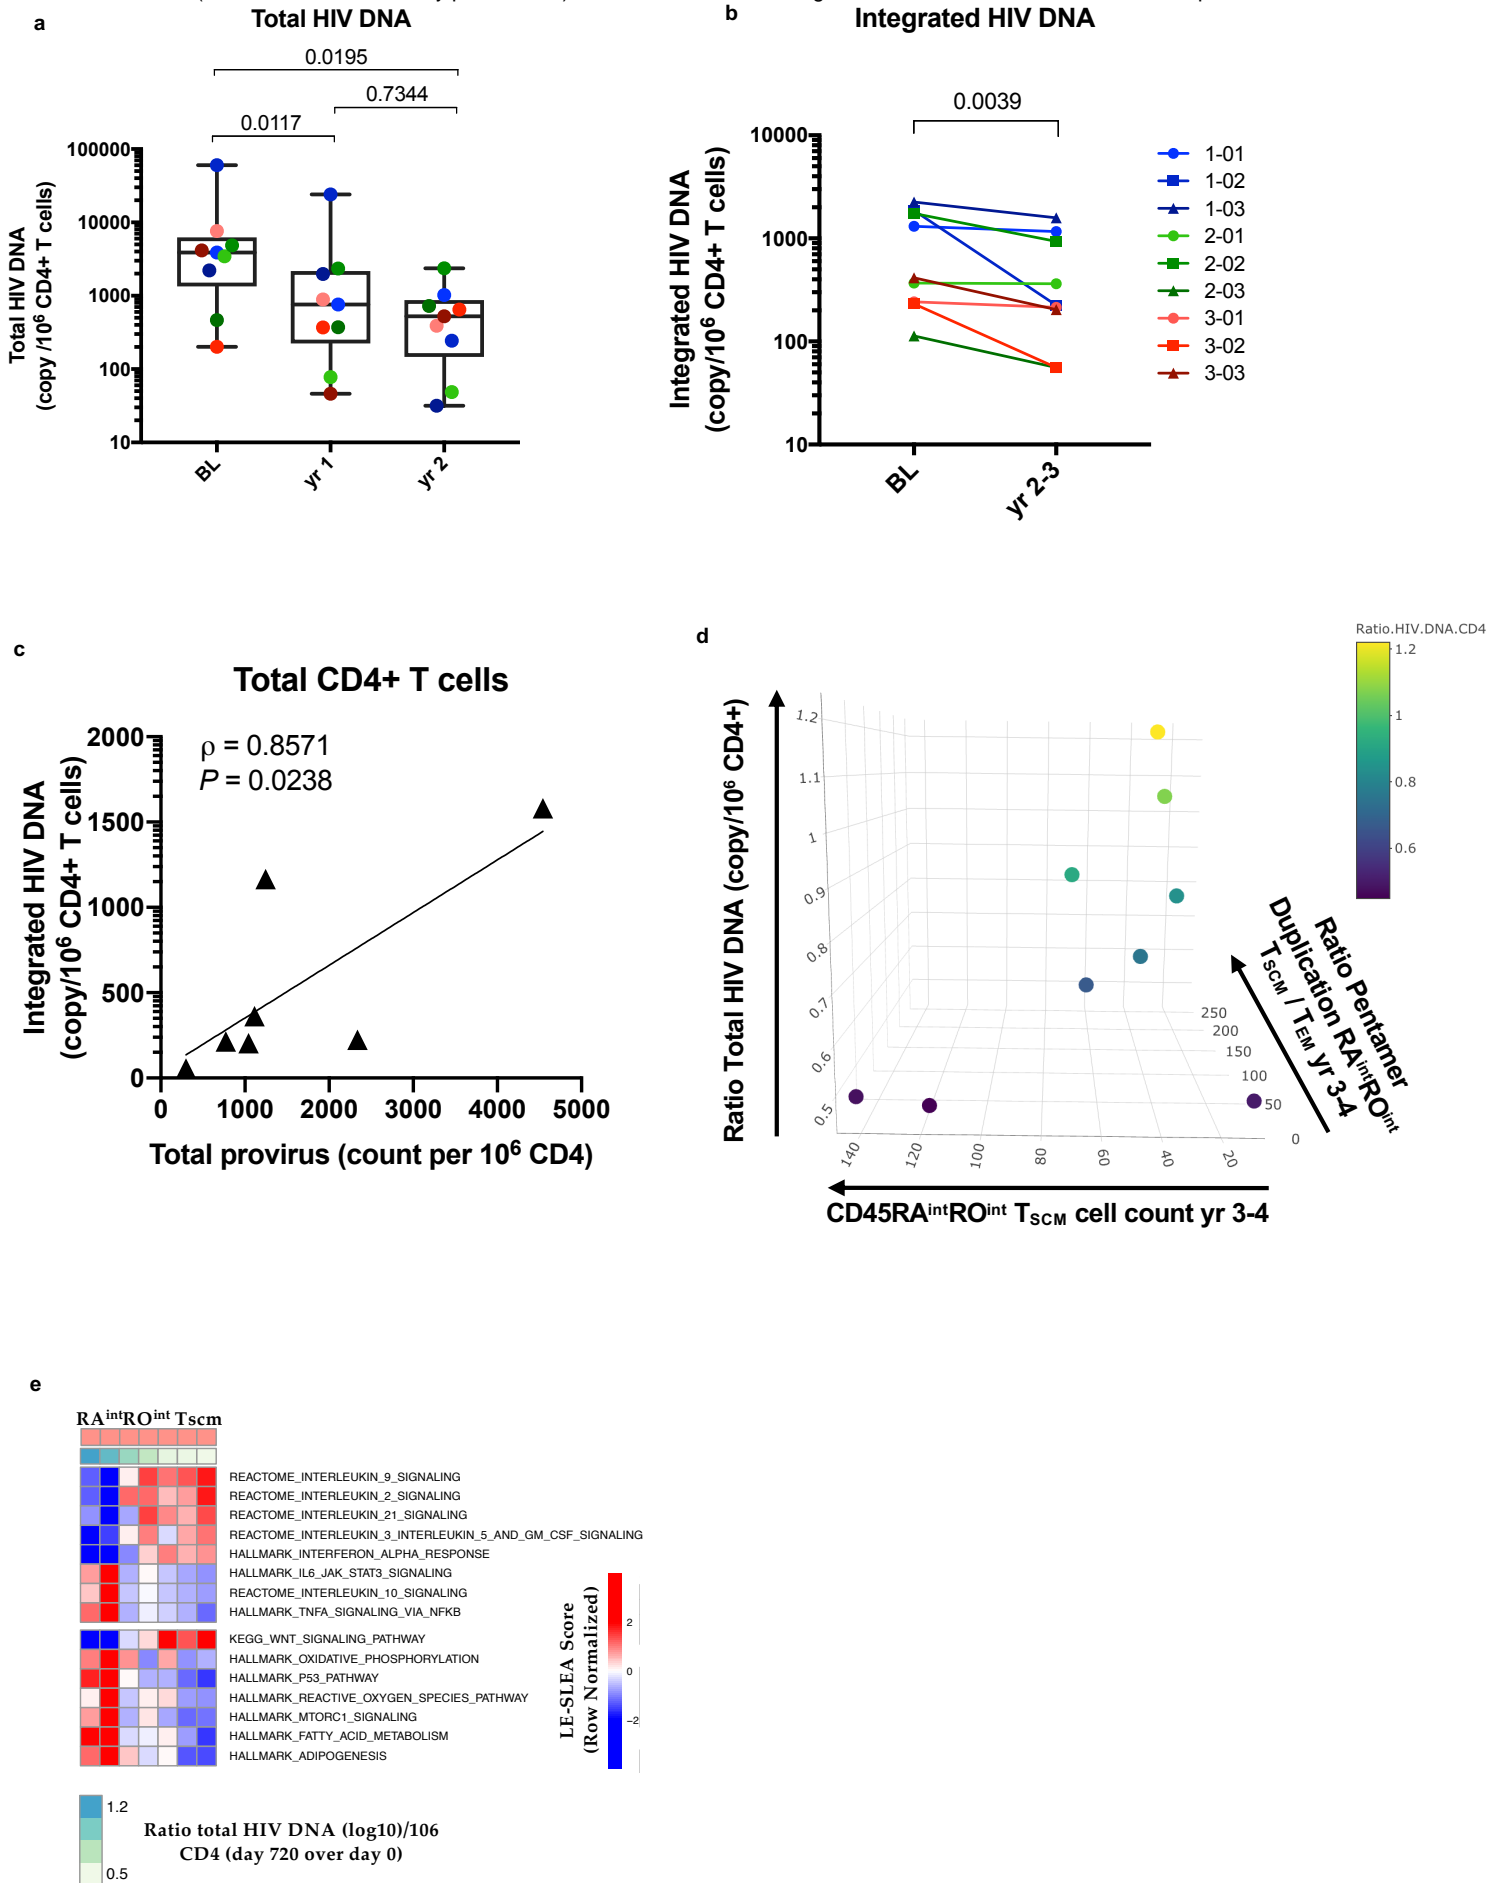

**Fig. 2**

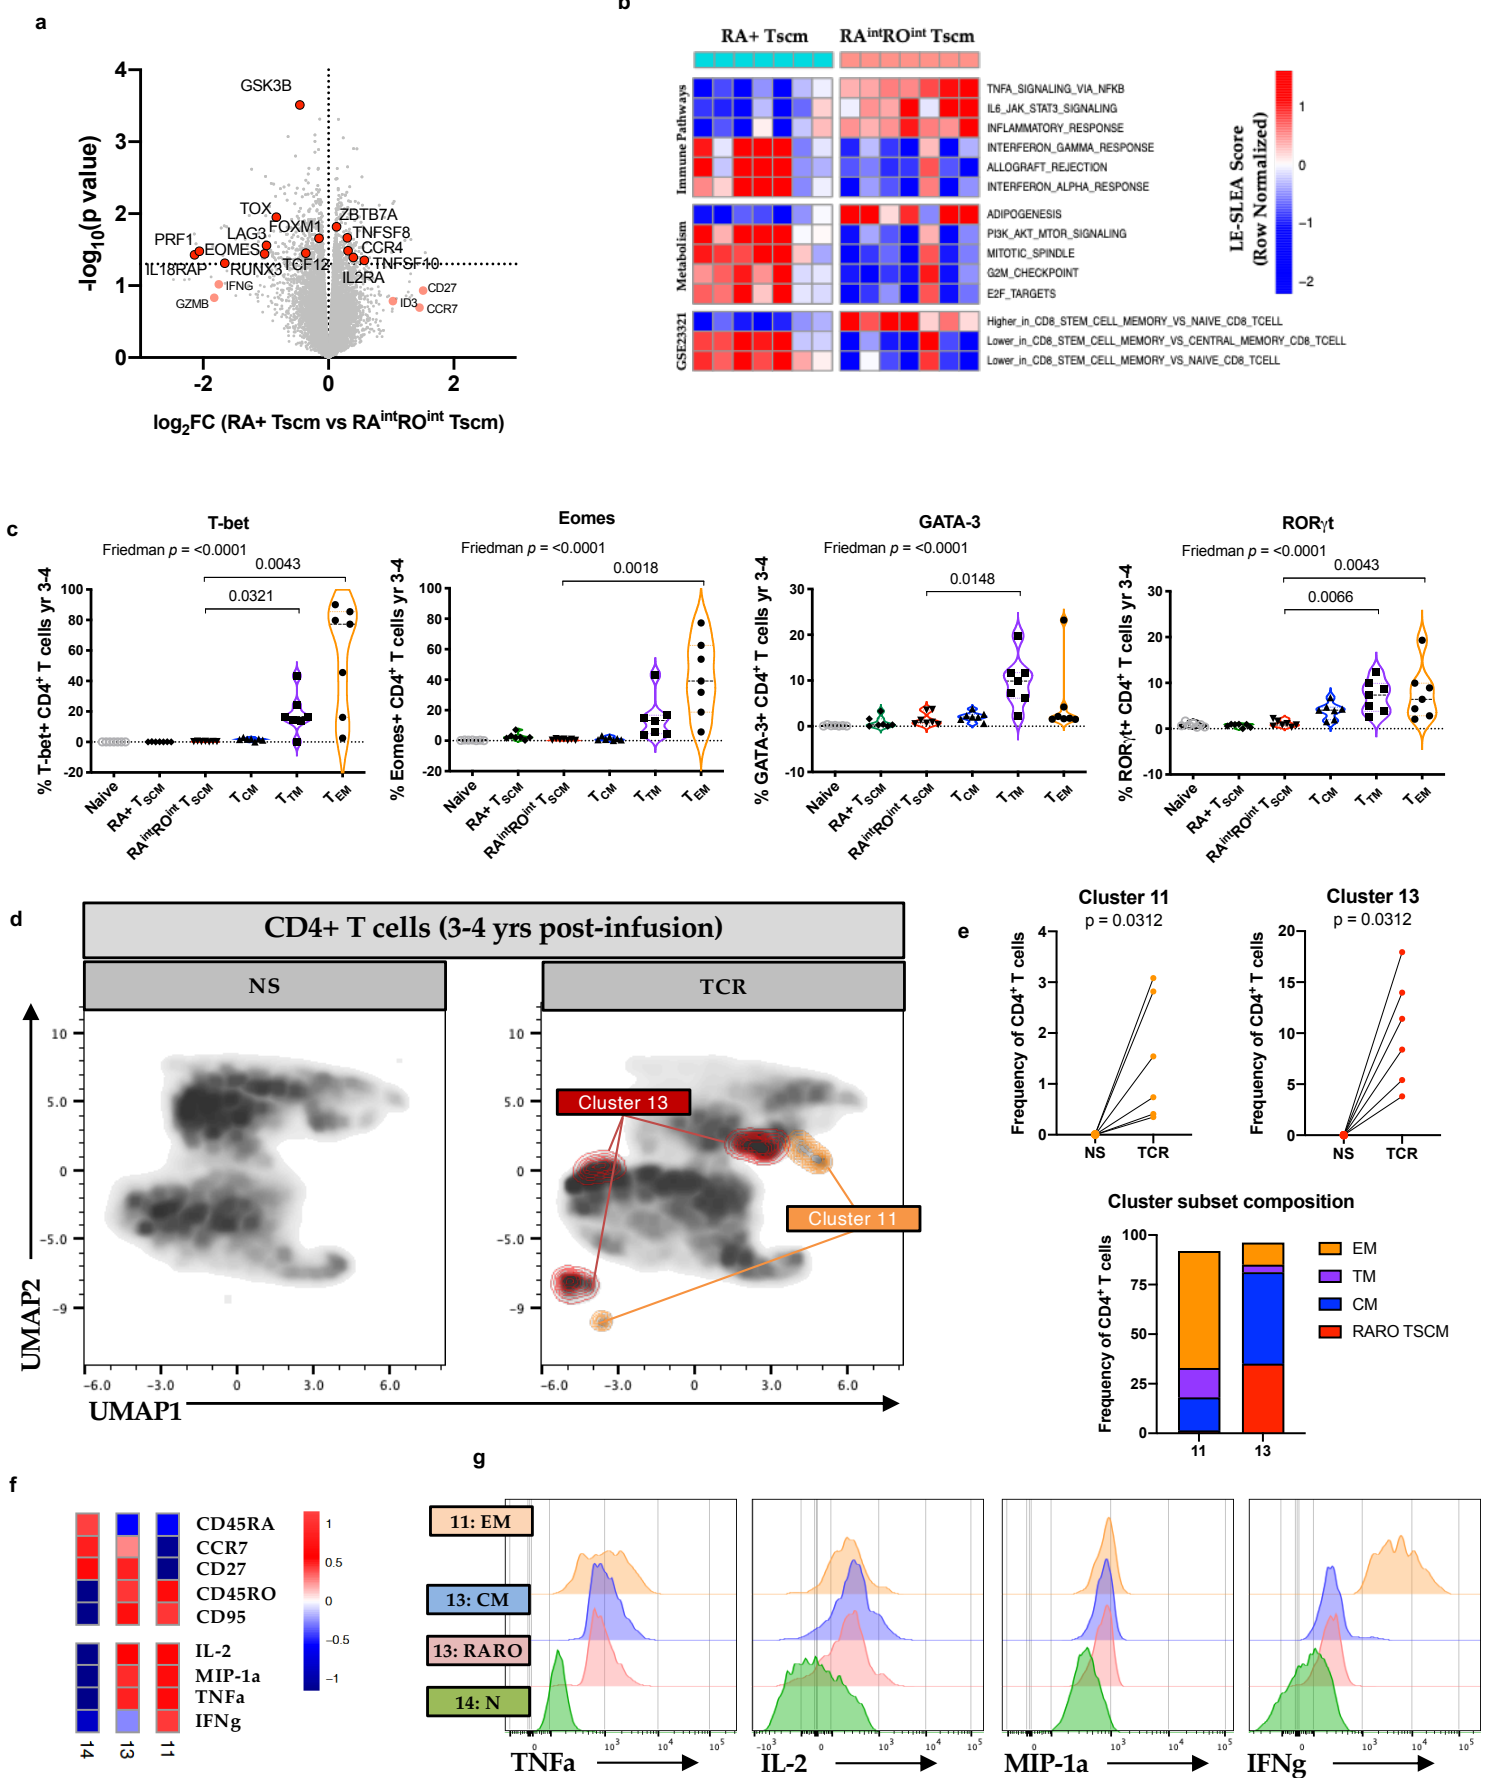

**Fig. 3**



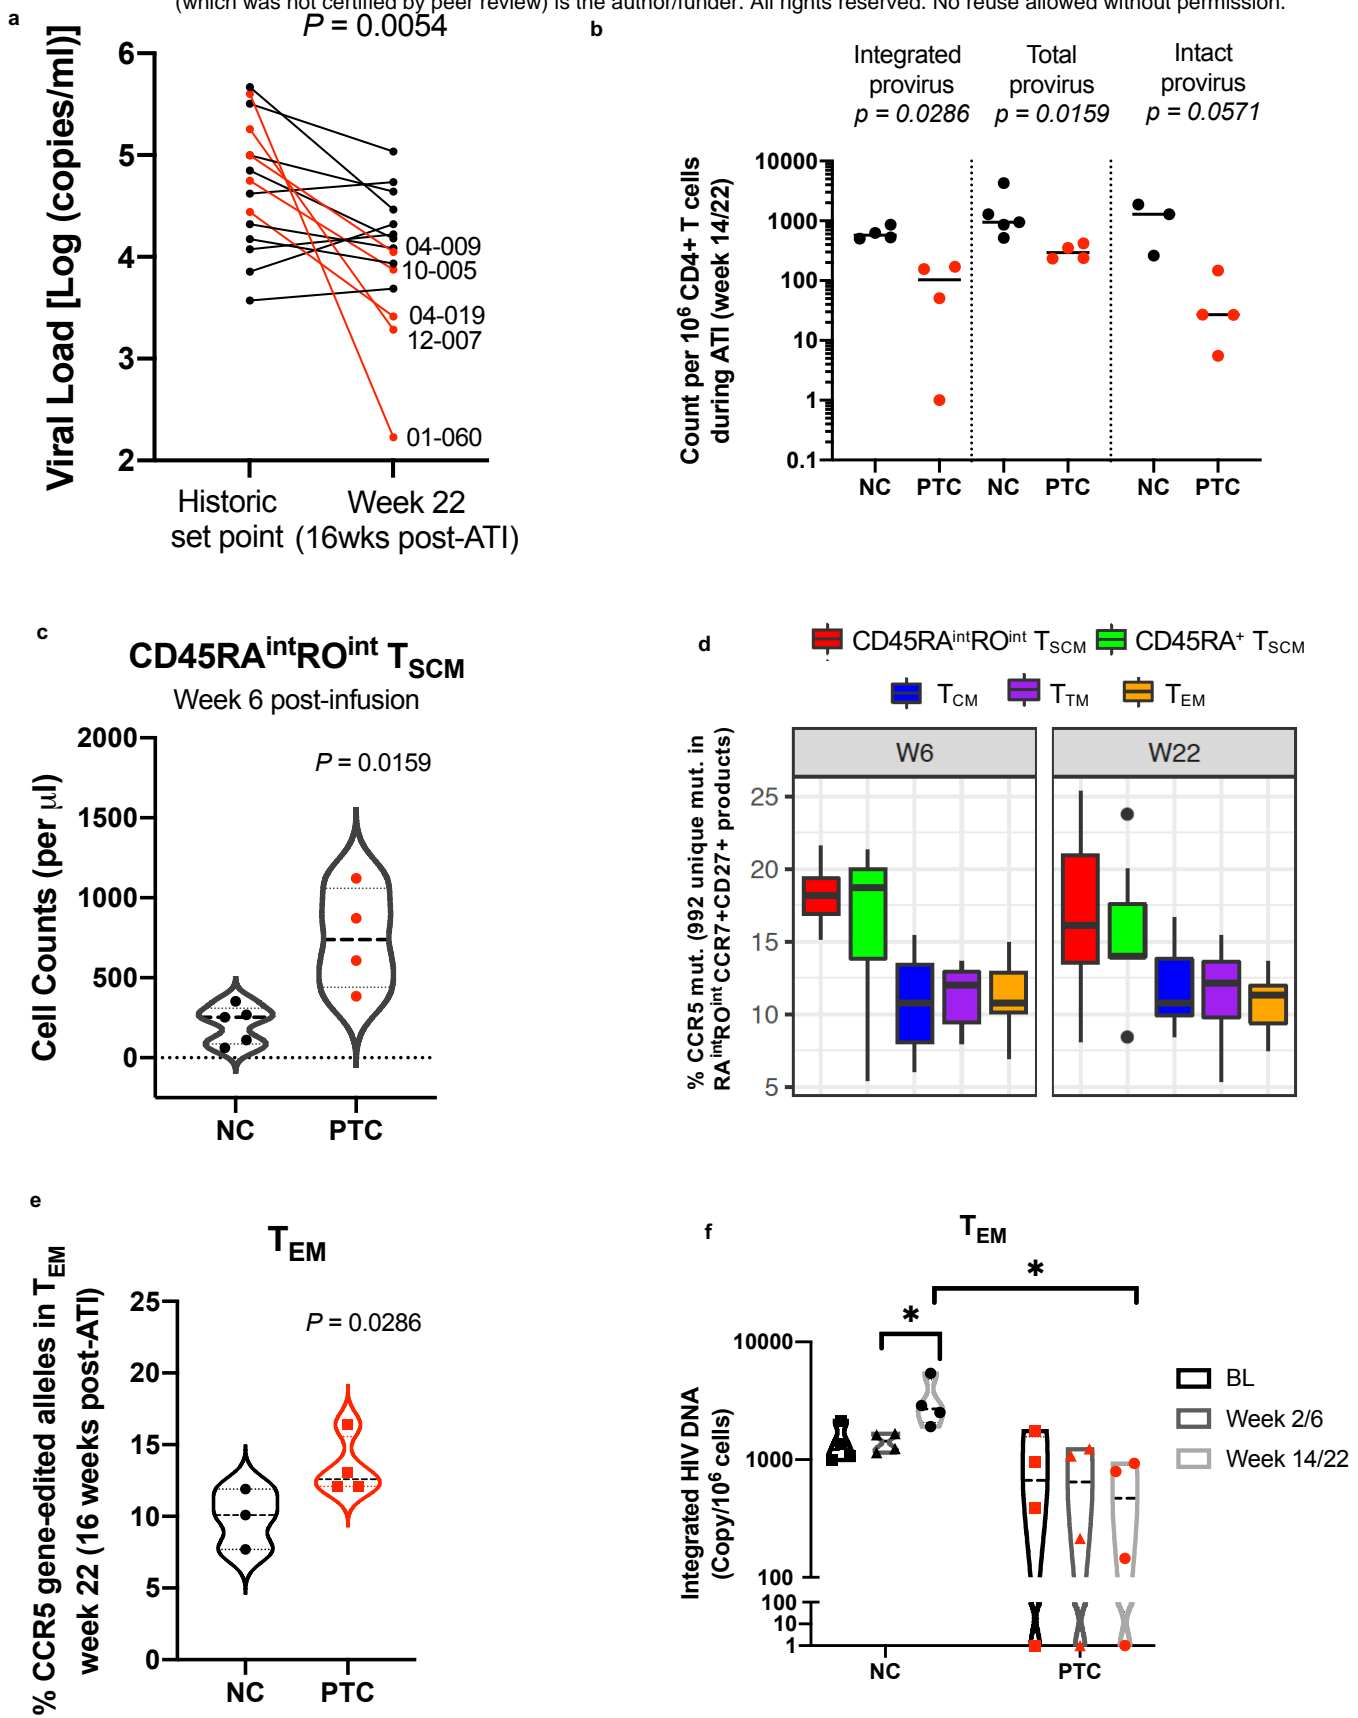

Fig. 4

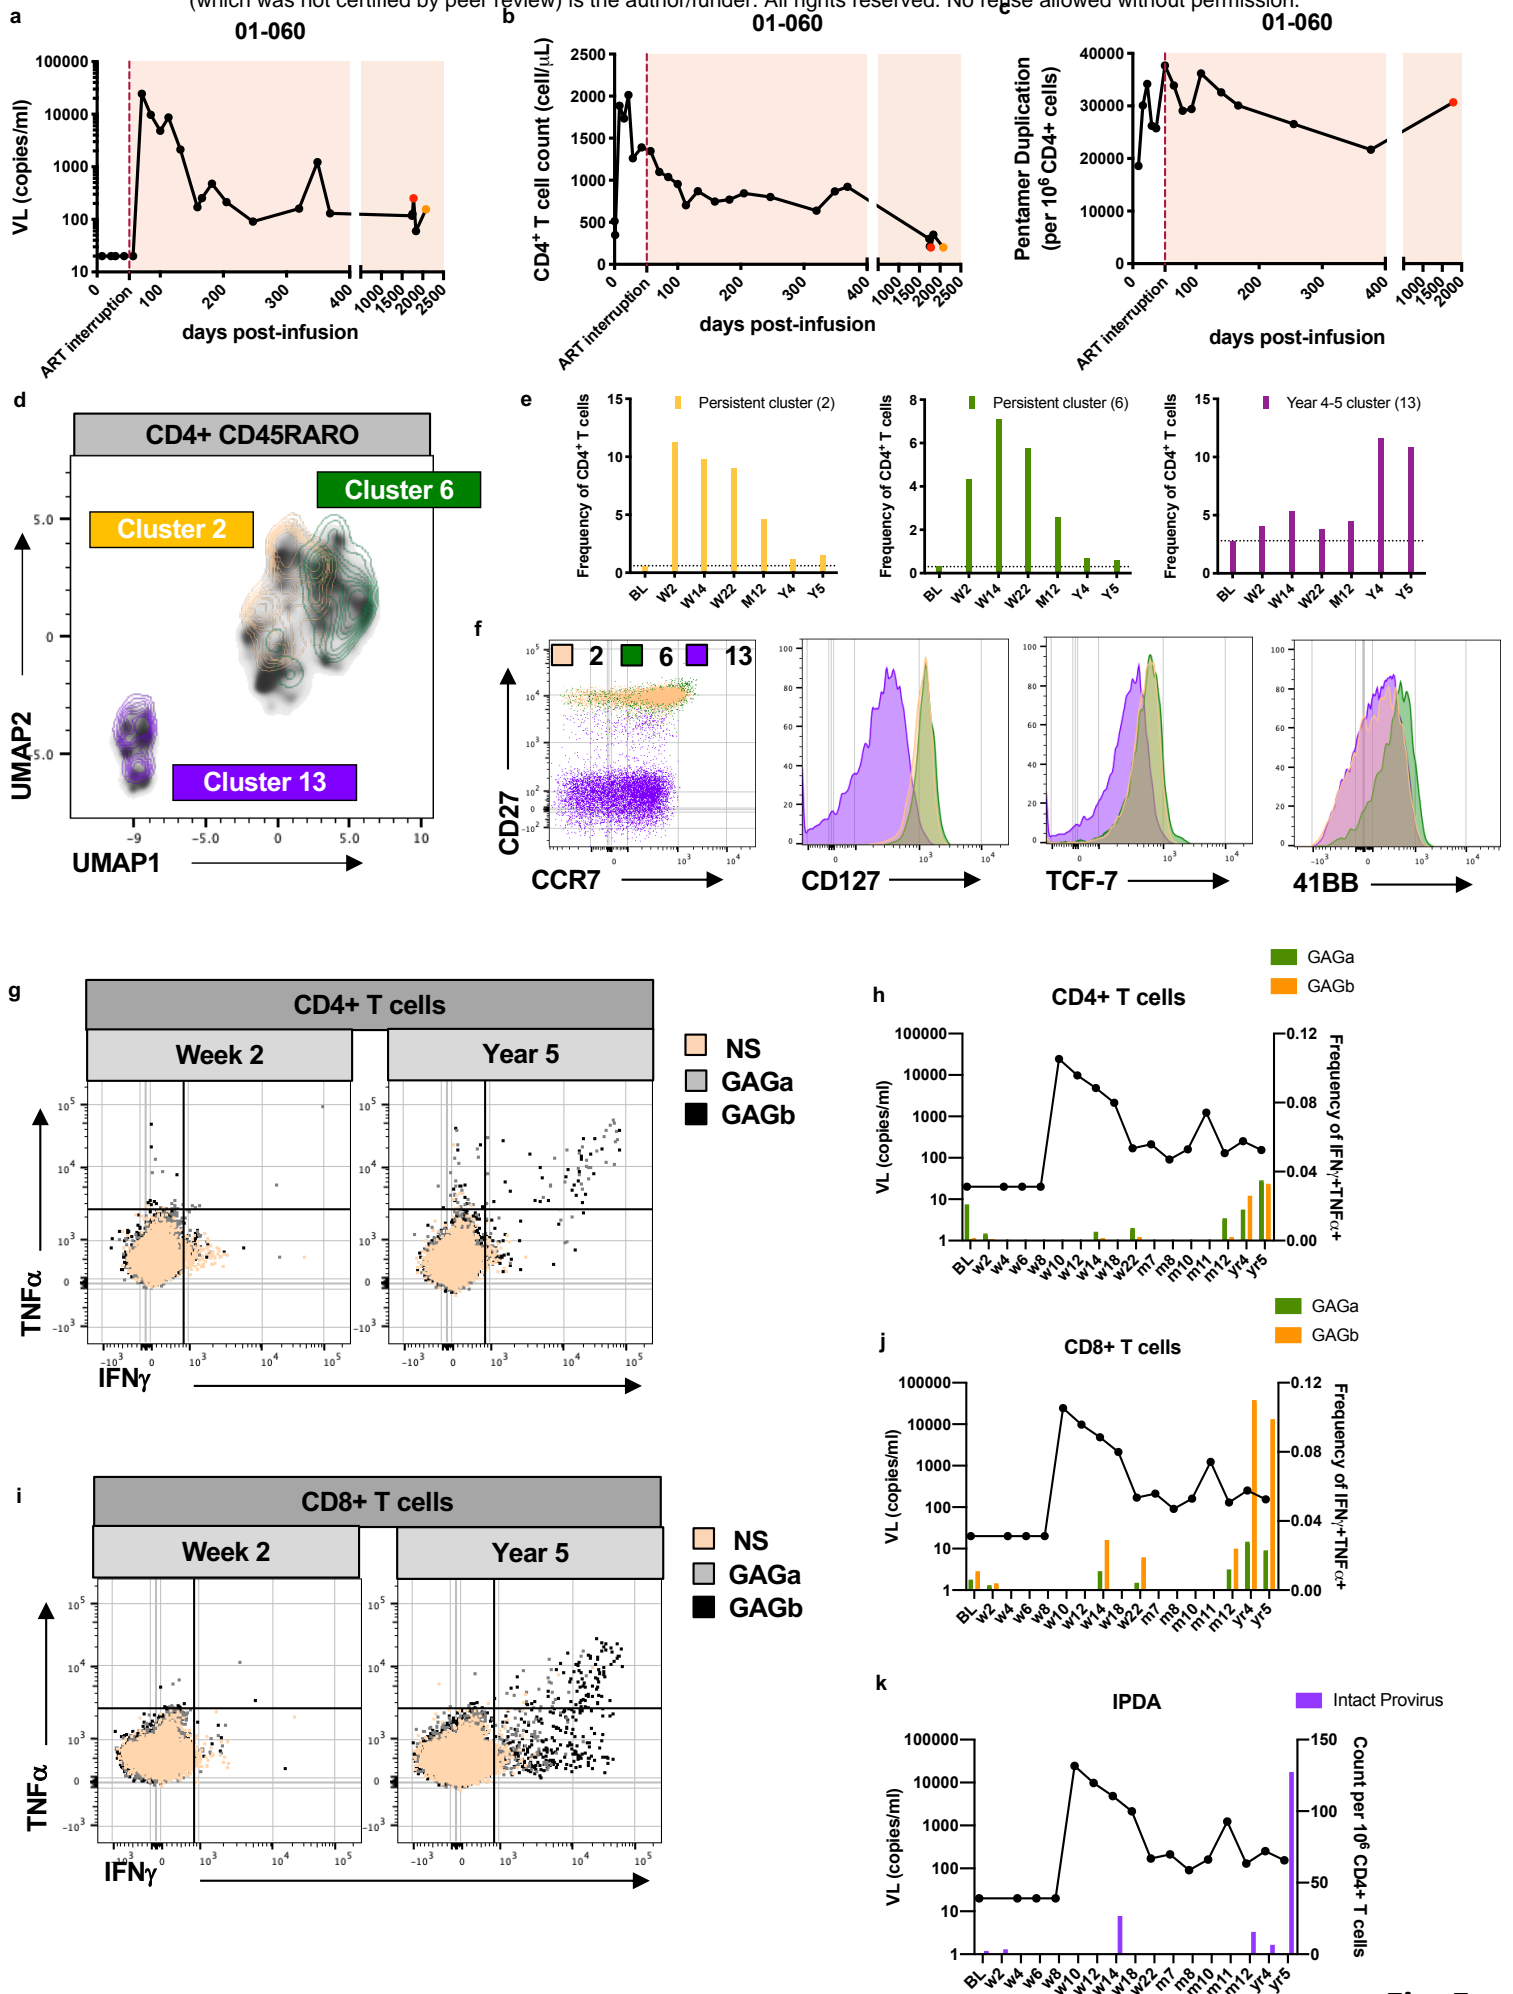

**Fig. 5**
